# Supplementary material for: Single-cell profiling reveals the trajectory of FOLR2-expressing tumor-associated macrophages to regulatory T cells in the progression of lung adenocarcinoma
Source: PubMed Central journal article supplement (PMC10397223; doi:10.1038/s41419-023-06021-6), 2023-08-02
Supplement: 41419_2023_6021_MOESM1_ESM.pdf [file 41419_2023_6021_MOESM1_ESM.pdf]

# Figure S1

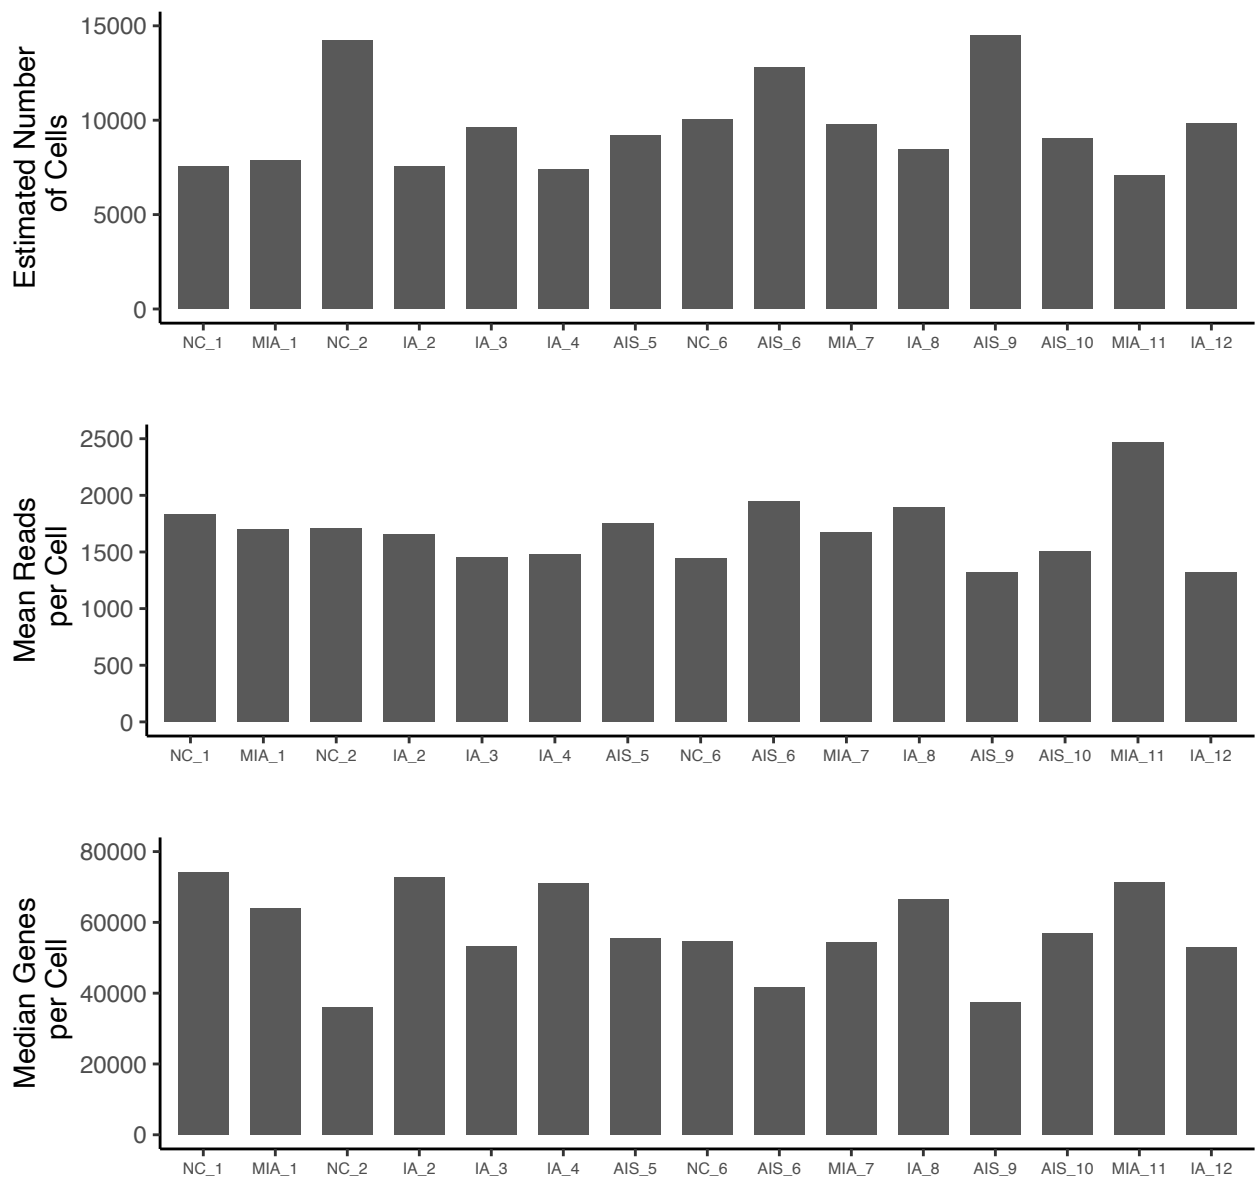

**Figure S1 Quality control of the sequencing samples.** The estimated number of cells passing quality control (top), mean reads per cell (middle), and the number of median genes per cell of each sample (bottom).

# Figure S2

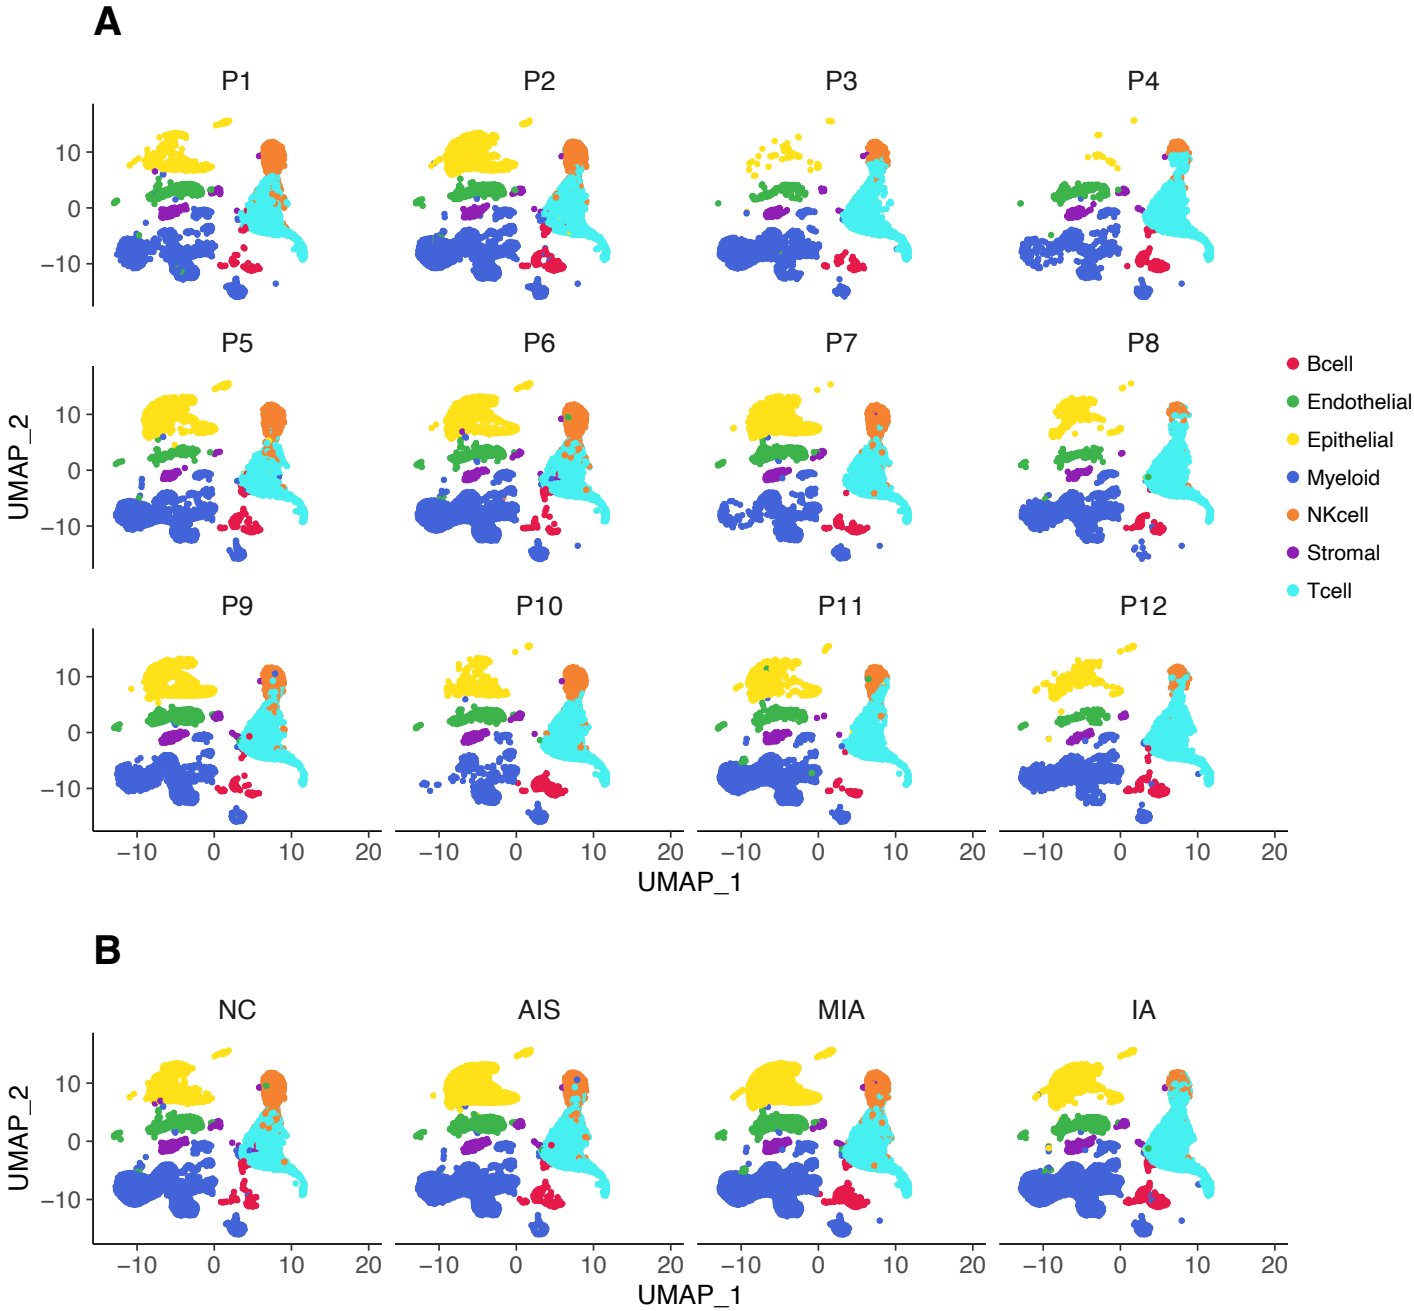

**Figure S2 Origins of all cell types in 12 LUAD tissue samples. A:** UMAP visualization of all 12 LUAD patients, color-coded by cell type. **B:** UMAP visualization of LUAD stages (AIS, MIA, IA and normal lung tissue), color-coded by cell type.

**Figure S3**

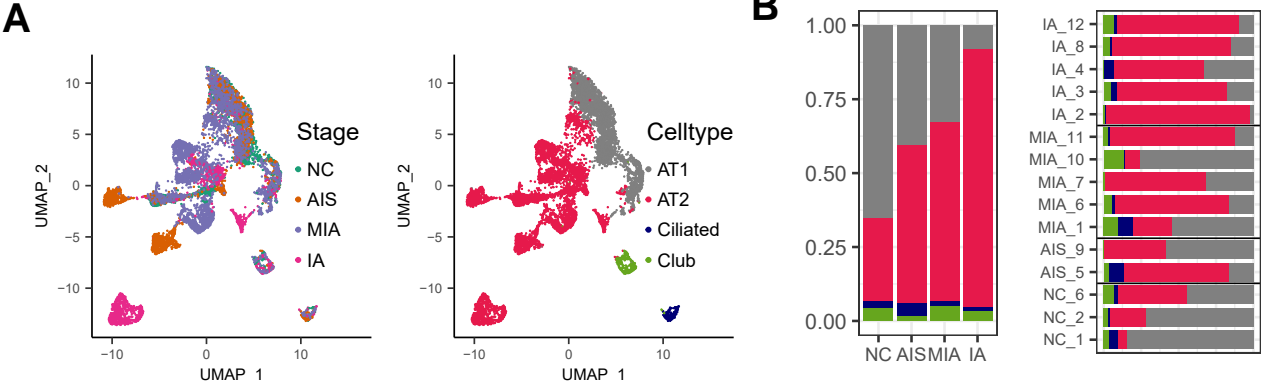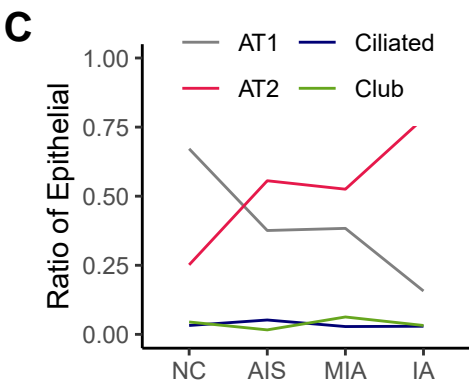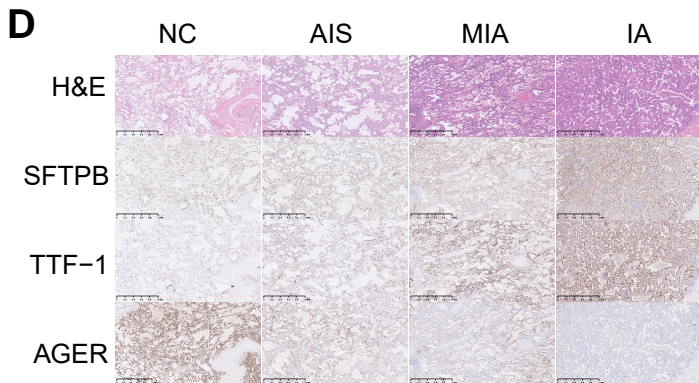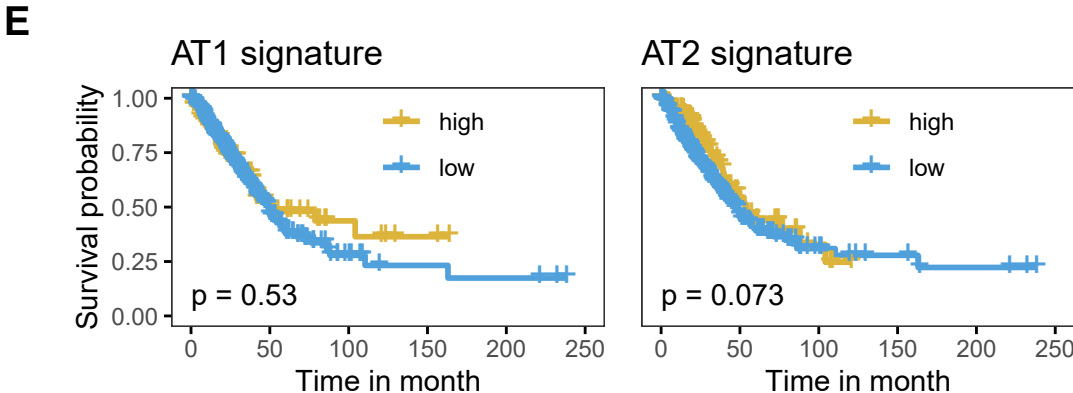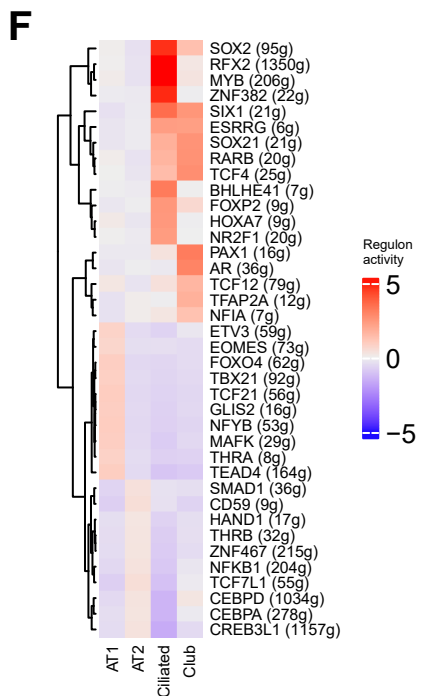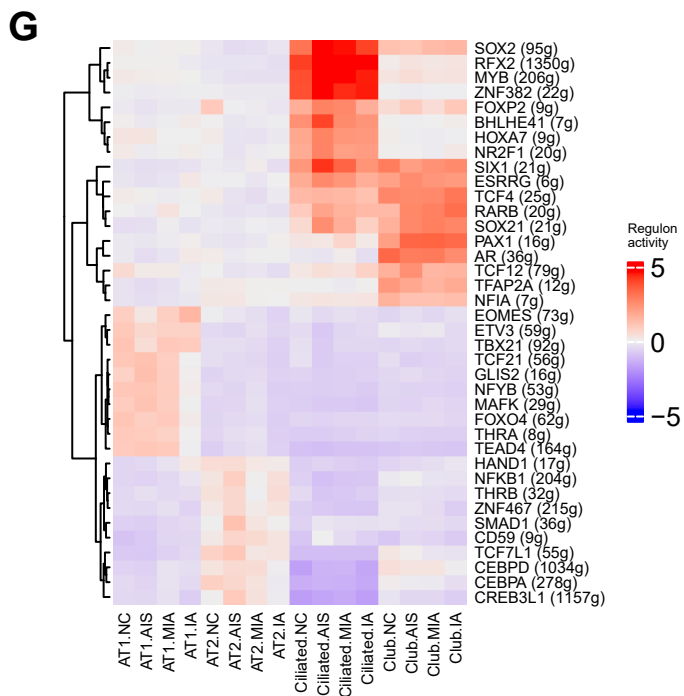

### **Figure S3 Analysis of the cellular composition of epithelial cells.**

A: UMAP of all epithelial single-cell transcriptomes color-coded by pathological stage (left) and cell type (right). B and C: Bar (B) and line (C) plots of relative fractions of epithelial cell subtypes in each pathological stage and each participant. D: Representative images of H&E and IHC staining for AT2 markers (SFTPB and TTF-1) and AT1 marker (AGER) at different pathological stages from NC, to AIS, MIA, and IA. Images of NC were captured from adjacent normal tissue of AIS. Cases in the same group showed similar IHC staining results. Scale bar, 1 mm. E: Kaplan-Meier overall survival curves of TCGA LUAD patients (n=510). The high or low group was divided by the upper quantile of AT1 or AT2 signature scores (AT1 signature high n=128 and low n=382; AT2 signature high n=382 and low n=128) by integrating the 10 top-ranked significantly differentially expressed genes in each cluster of this study. P-value (p) was calculated using the two-sided log-rank test. F-G: Heatmap of gene expression regulation by transcription factors in different cell types (F) and tumor stages (G) for the epithelial cells using SCENIC (Single-cell regulatory network inference and clustering).

**Figure S4**

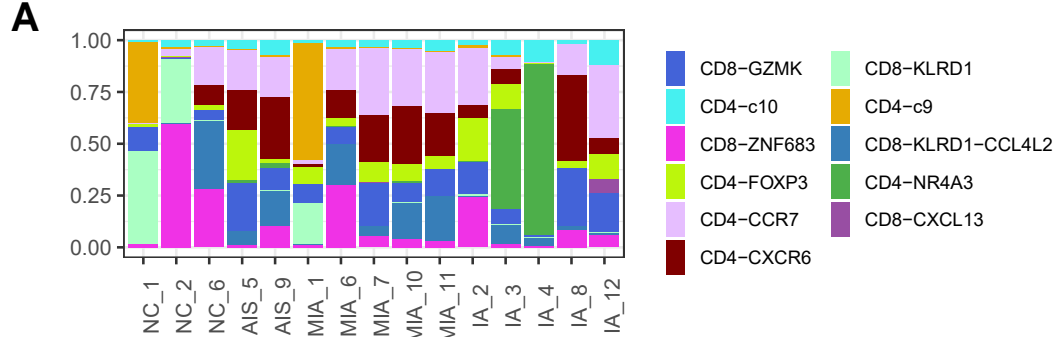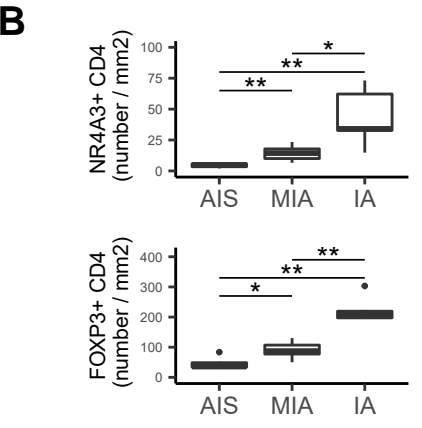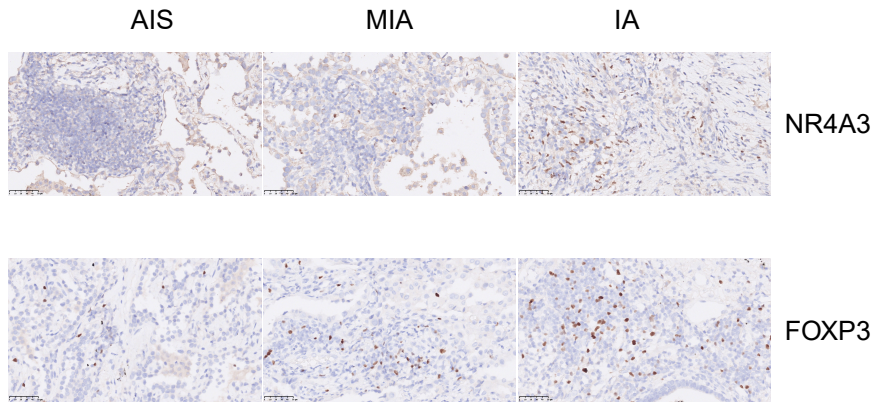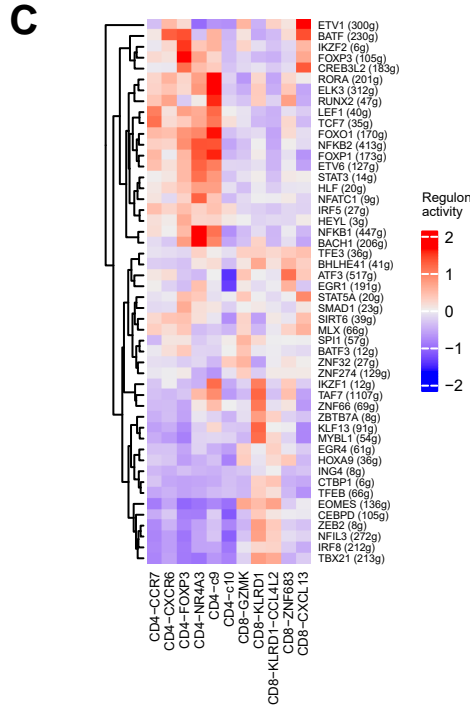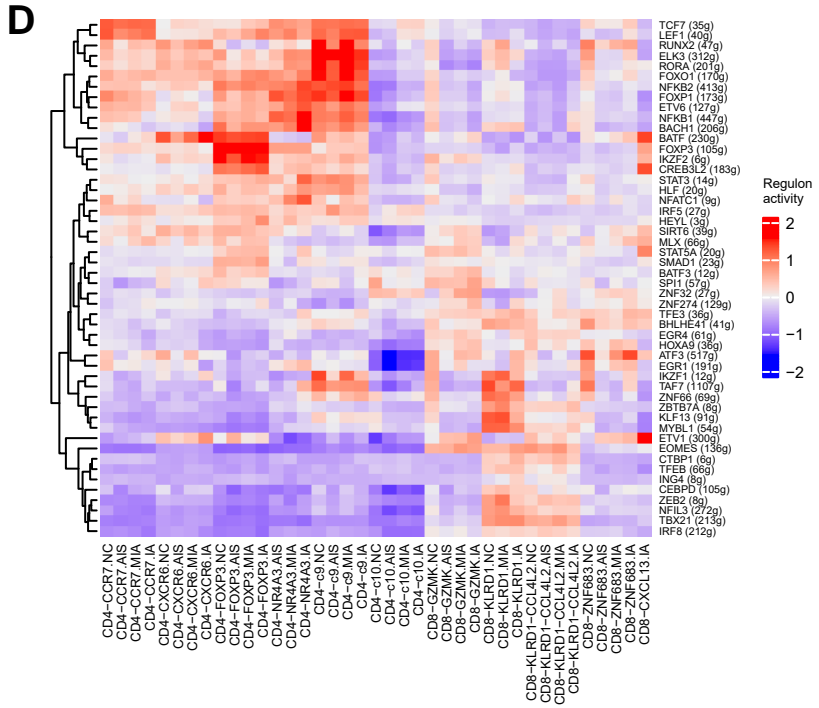

**Figure S4 Analysis of the cellular composition of T cells.** A: Relative fractions of eleven major T cell subtypes of the participants. B: Comparison of the densities for NR4A3<sup>+</sup> (top left) or FOXP3<sup>+</sup> (bottom left) cells among different pathological stages of LUAD (two-sided Wilcoxon rank-sum test, \* $p < 0.05$ , \*\* $p < 0.01$ ) with representative IHC images showing on the right. The counts of five randomly chosen 1 mm<sup>2</sup> areas from each sample were recorded for comparison. Each group included counts from 5 cases with 25 areas. Scale bar, 50  $\mu$ m. C–D: Heatmap showing the regulation of gene expressions by transcription factors in different cell types (C) and tumor stages (D) for the T cells using SCENIC.

**Figure S5**

**A**

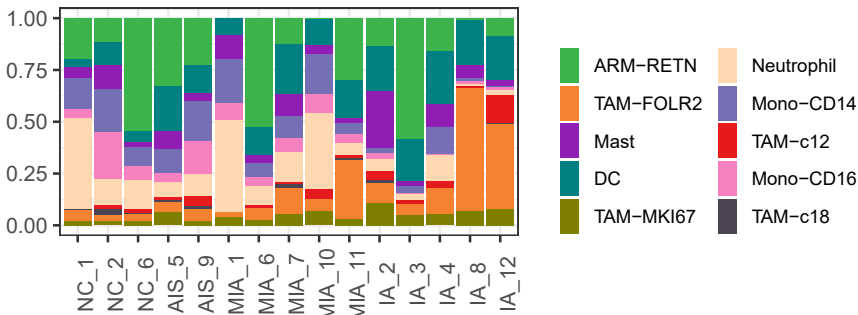

**B**

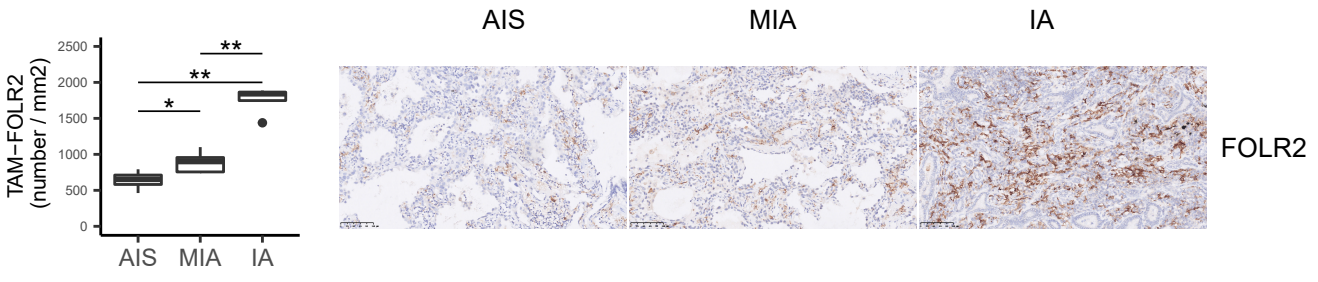

**C**

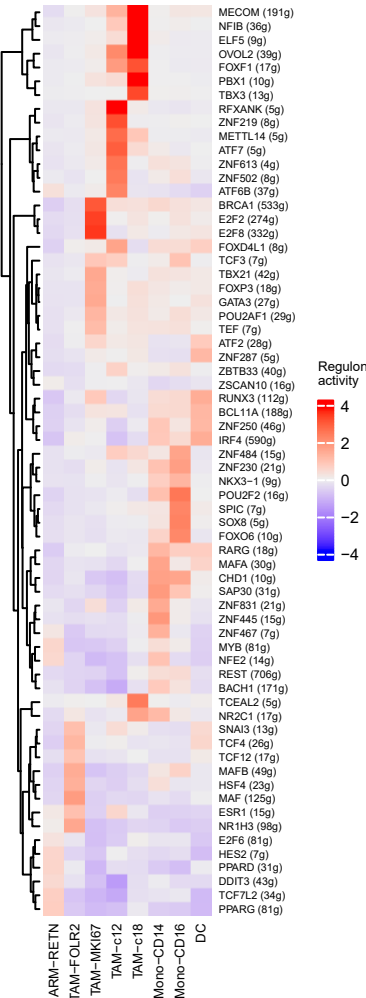

**D**

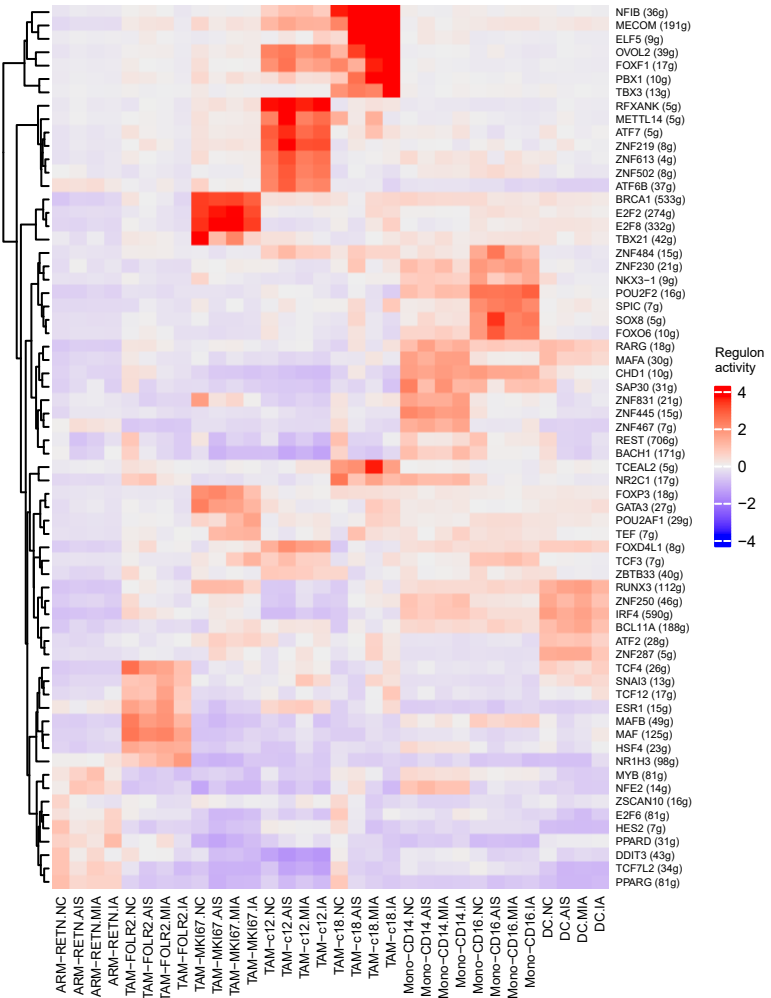

### **Figure S5 Analysis of the cellular composition of myeloid cells.**

A: Relative fractions of ten major myeloid cell subtypes of the participants.

B: Comparison of the densities for FOLR2<sup>+</sup> (left) cells among different pathological stages of LUAD (two-sided Wilcoxon rank–sum test, \* $p < 0.05$ , \*\* $p < 0.01$ ) with representative IHC images showing on the right. The number of FOLR2<sup>+</sup> cells was evaluated at five randomly chosen identical areas within the neoplastic region of each sample. The density of each area was calculated by dividing the number of positive cells by the area (mm<sup>2</sup>) of the viewed fields. The five values of density for each sample were recorded for comparison. Each group included values from 5 cases with 25 areas. Scale bar, 100  $\mu$ m. C-D: Heatmap showing the regulation of gene expression by transcription factors in different cell types (C) and tumor stages (D) for the myeloid cells using SCENIC.



**Figure S6**

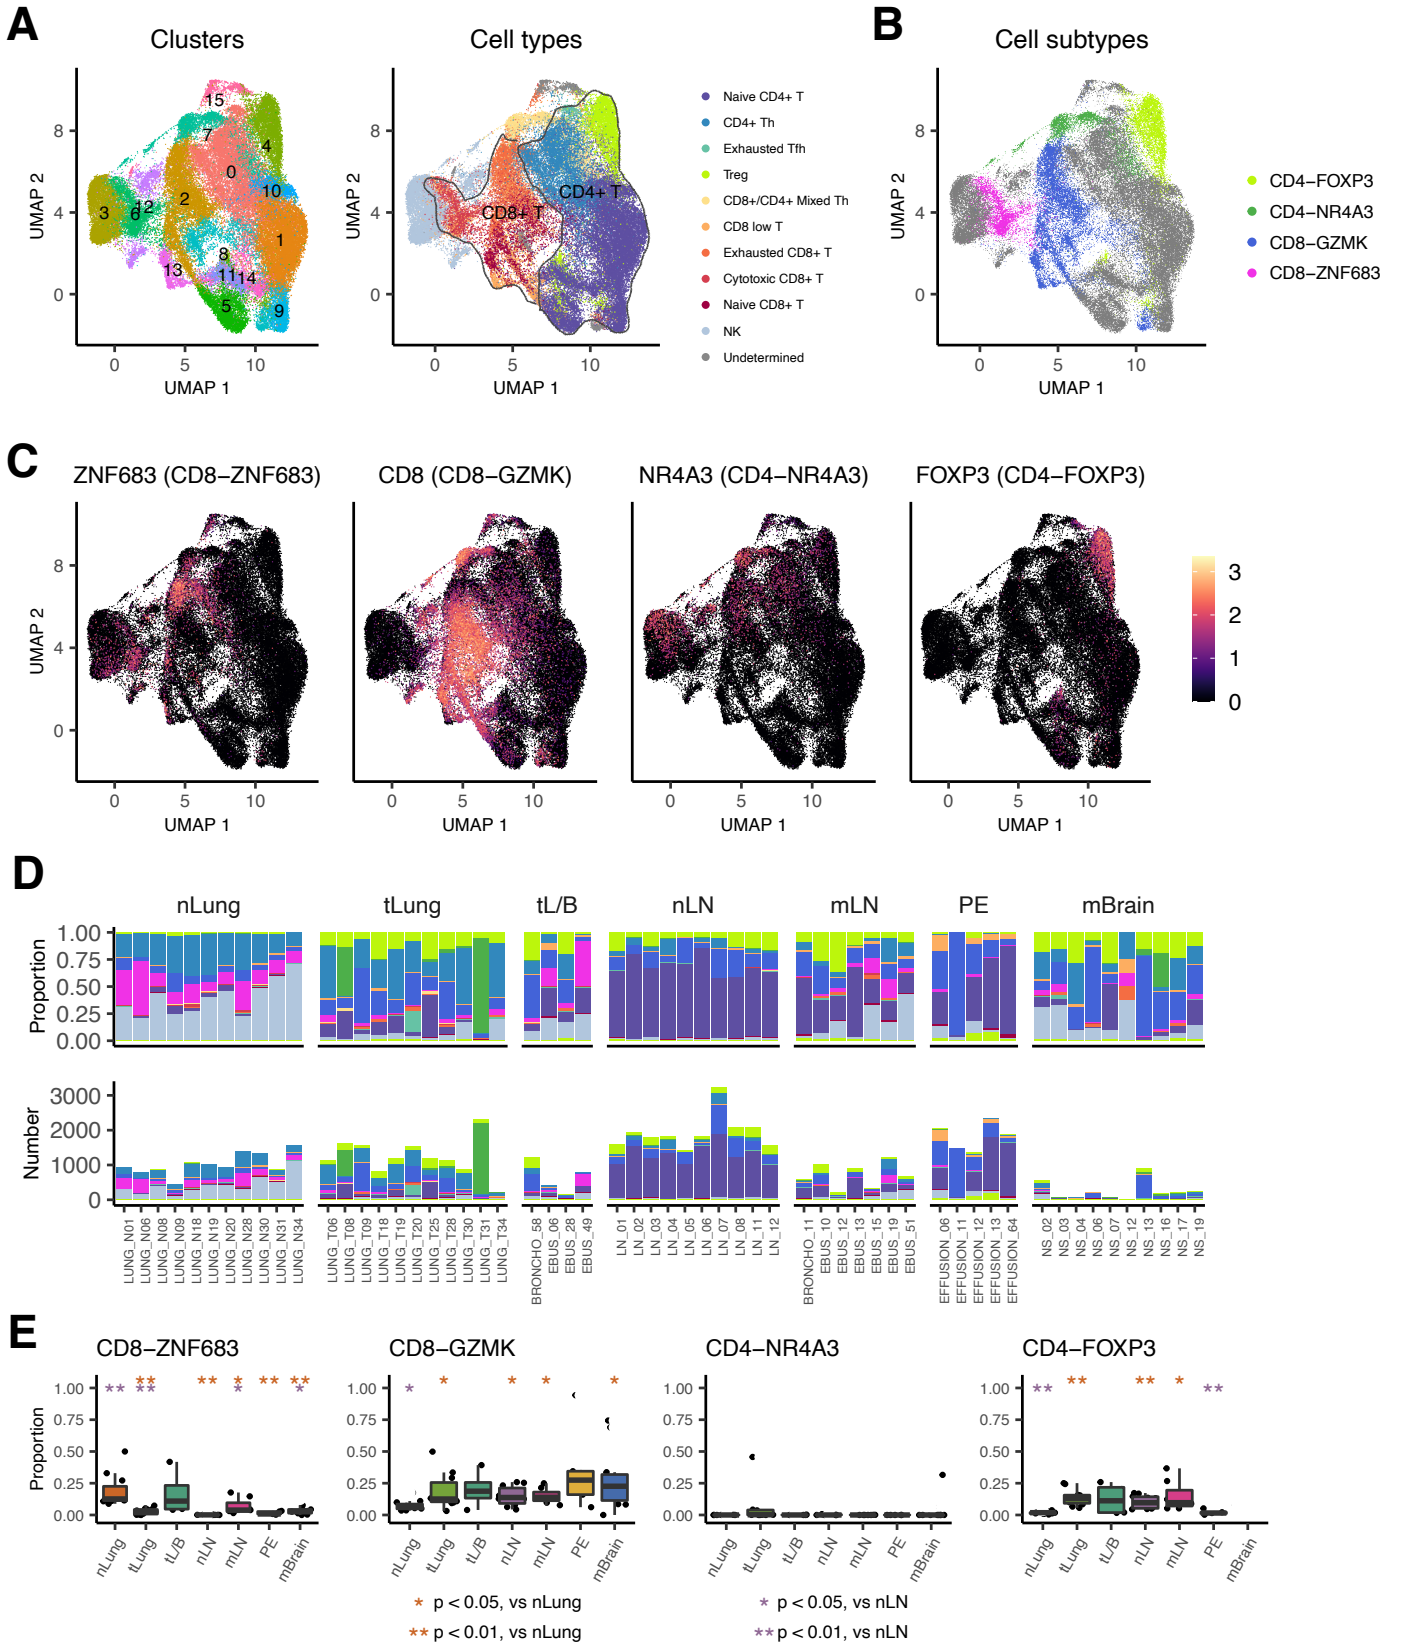

**Figure S6 Analysis of T cell subtypes from normal tissues to early and advanced stages of LUAD using Kim and colleagues' single-cell dataset (PMID: 32385277).** A: UMAP plot of T cells, color-coded by clusters (left) or Kim's original cell types (right). B: UMAP plot of CD4-FOXP3, CD4-NR4A3, CD8-GZMK, and CD8-ZNF683 subsets identified by the specific markers in our study. C: UMAP plot of selected marker gene expressions for cell subsets showing in B. D: Relative proportion (top panel) or cell number (bottom panel) of T cell subsets in each sample among different types of lung cancer samples. nLung, normal lung tissues, n=11; tLung, cancer tissues from primary sites, n=11; tL/B, cancer tissues from biopsies or metastases, n=4; nLN, normal lymph nodes, n=10; mLN, metastatic lymph nodes, n=7; PE, pleural fluids, n=5; mBrain, brain metastases, n=10. Colors represent assigned cell types as in A (right) and B. E: Tissue preference of CD8-ZNF683, CD8-GZMK, CD4-NR4A3, and CD4-FOXP3 cell types. Black dots represent different patients. \* $p < 0.05$ ; \*\* $p < 0.01$ , two-sided Wilcoxon rank-sum test.

**Figure S7**

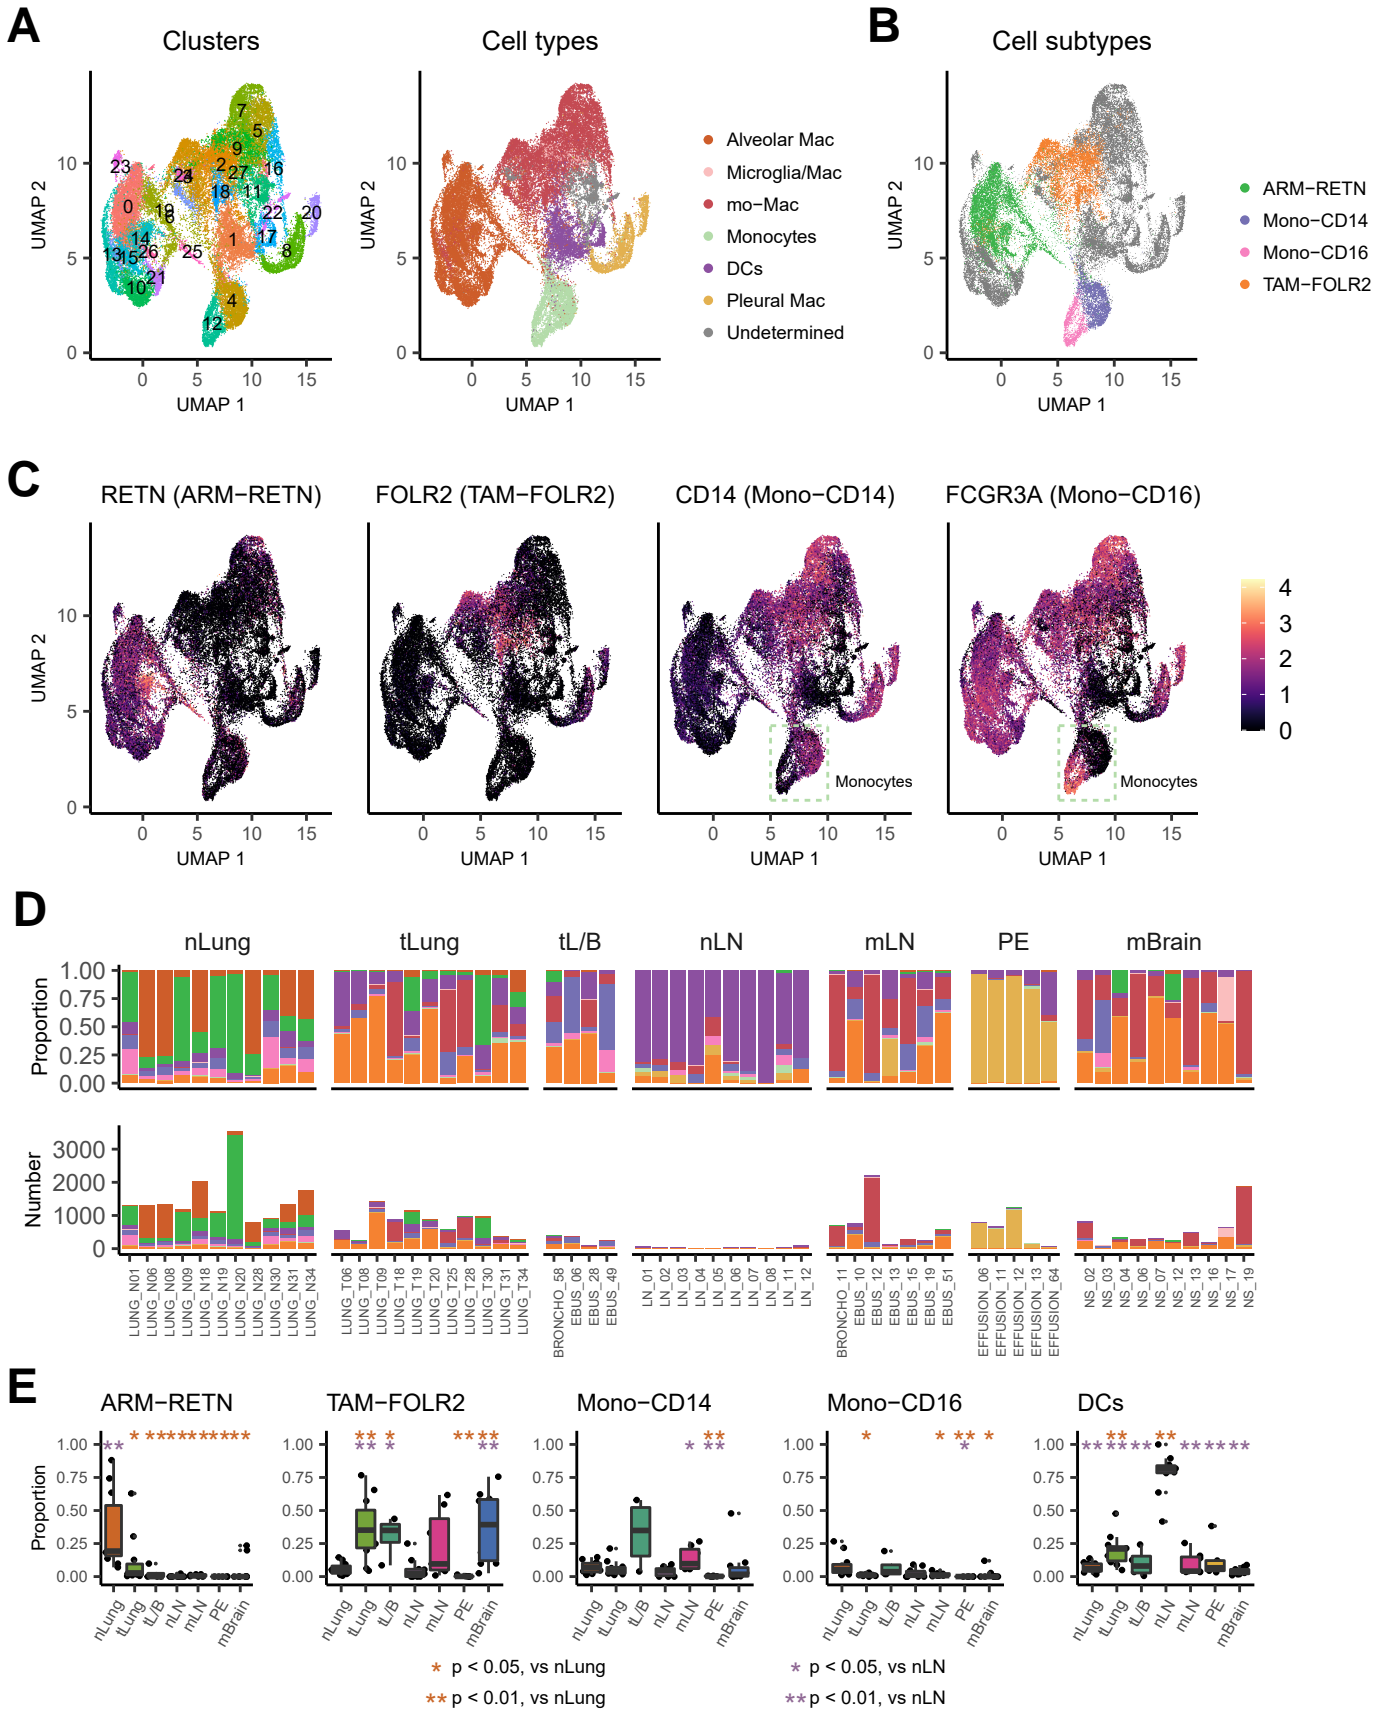

**Figure S7 Analysis of myeloid cell subtypes from normal tissues to early and advanced stages of LUAD using Kim and colleagues' single-cell dataset (PMID: 32385277).** A: UMAP plot of myeloid cells, color-coded by clusters (left) and Kim's original cell types (right). B: UMAP plot of ARM-RETN, TAM-FOLR2, Mono-CD14, and Mono-CD16 subsets identified by the specific markers in our study. C: UMAP plot of selected marker gene expressions for cell subsets showing in B. D: Cell relative proportion (top panel) or cell number (bottom panel) of myeloid subsets in each sample among different types of lung cancer samples. nLung, normal lung tissues, n=11; tLung, cancer tissues from primary sites, n=11; tL/B, cancer tissues from biopsies or metastases, n=4; nLN, normal lymph nodes, n=10; mLN, metastatic lymph nodes, n=7; PE, pleural fluids, n=5; mBrain, brain metastases, n=10. Colors represent assigned cell types as in A (right) and B. E: Tissue preference of ARM-RETN, TAM-FOLR2, Mono-CD14, Mono-CD16, and DCs cell types. Black dots represent different patients. \* $p < 0.05$ ; \*\* $p < 0.01$ , two-sided Wilcoxon rank-sum test.

**Figure S8**

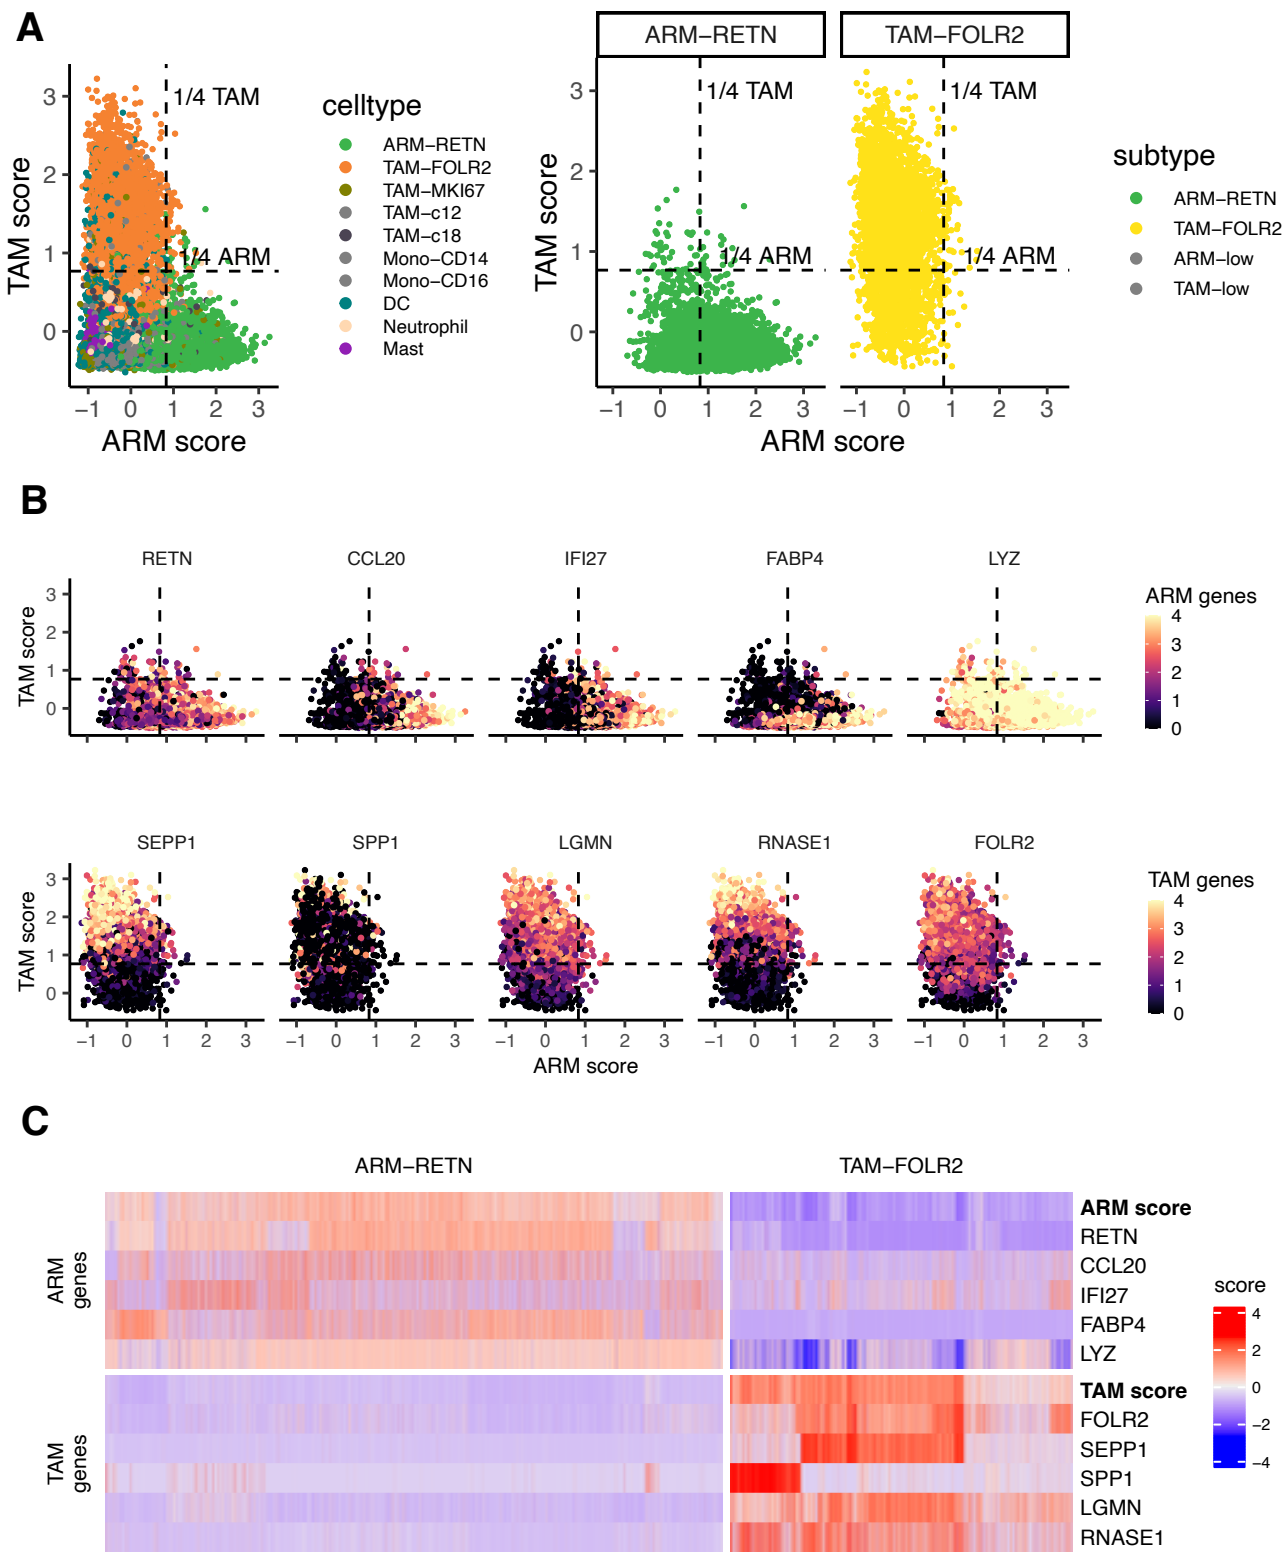

**Figure S8 Principal coordinate analysis of different myeloid cell subtypes.**  
 A: Two-dimensional visualization based on TAM and ARM signatures of myeloid cells (left) and two major ARM and TAM subtypes (right). B: Two-dimensional visualization of ARM or TAM specifically expressed genes. C: Heatmap of TAM and ARM signature scores and expressions of signature genes in ARM-RETN (left) or TAM-FOLR2 (right) cells.

**Figure S9**

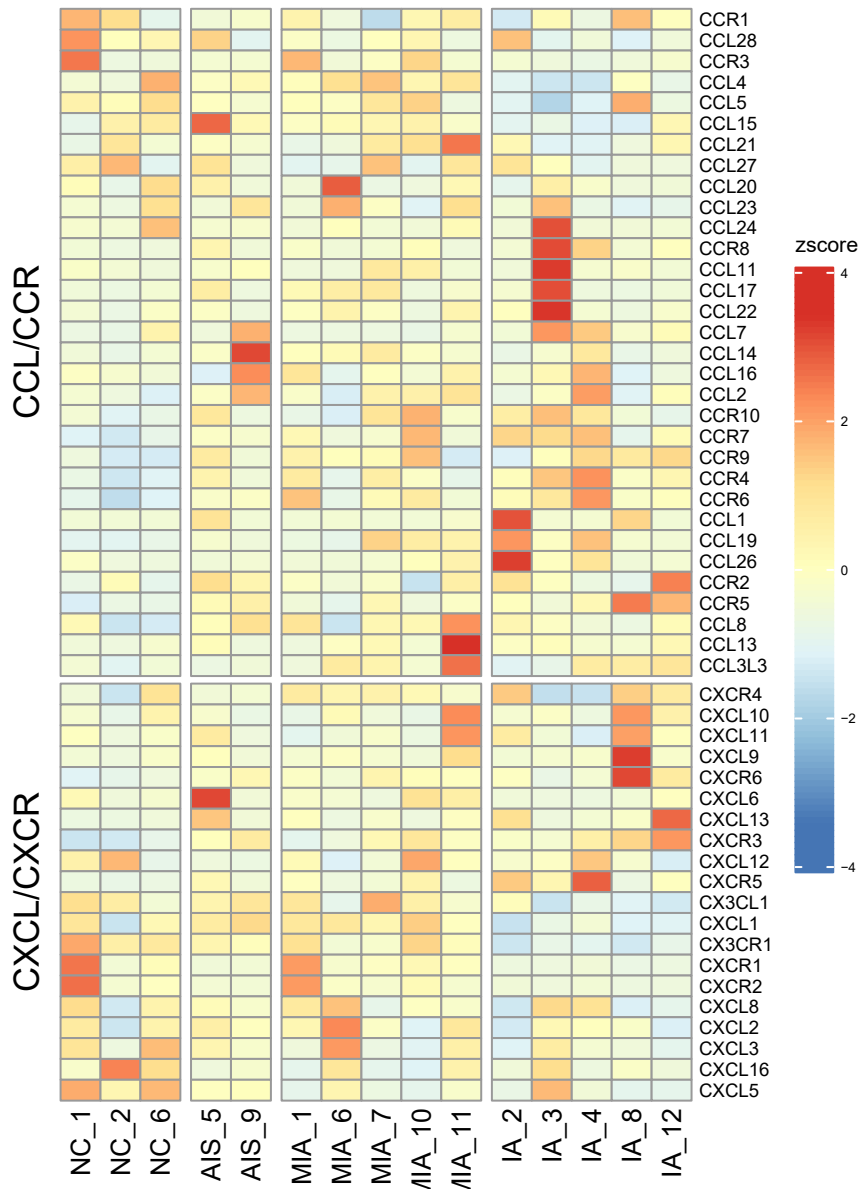

**Figure S9 Heatmap of the chemokine ligand/receptor transcriptome of each participant.**

**Figure S10**

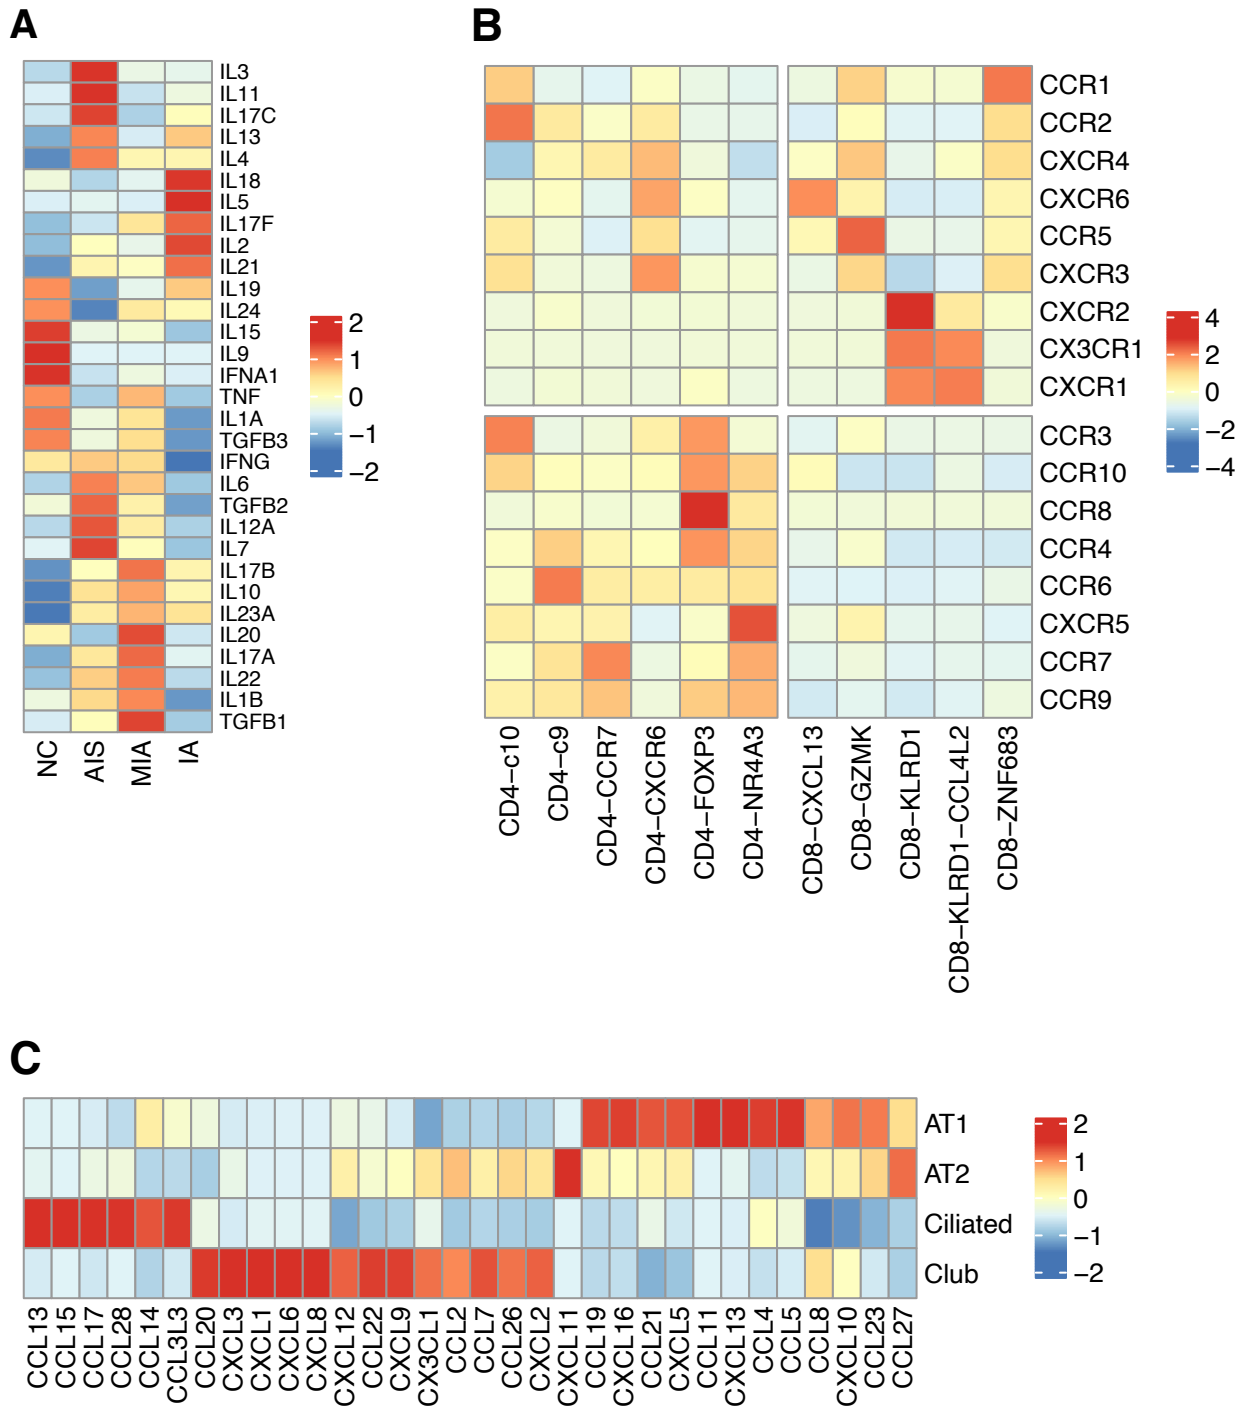

**Figure S10 Heatmap of the relative expressions of chemokine ligand/receptor transcriptomes.** A: Heatmap of the expression levels of inflammatory factor transcriptomes in normal lung samples and lung tumors at different pathological stages. B: Heatmap of the expression levels of chemokine receptors (CCRs/CXCRs) in T cells. C: Heatmap of the expression levels of chemokine ligands in epithelial cells.

Figure S11

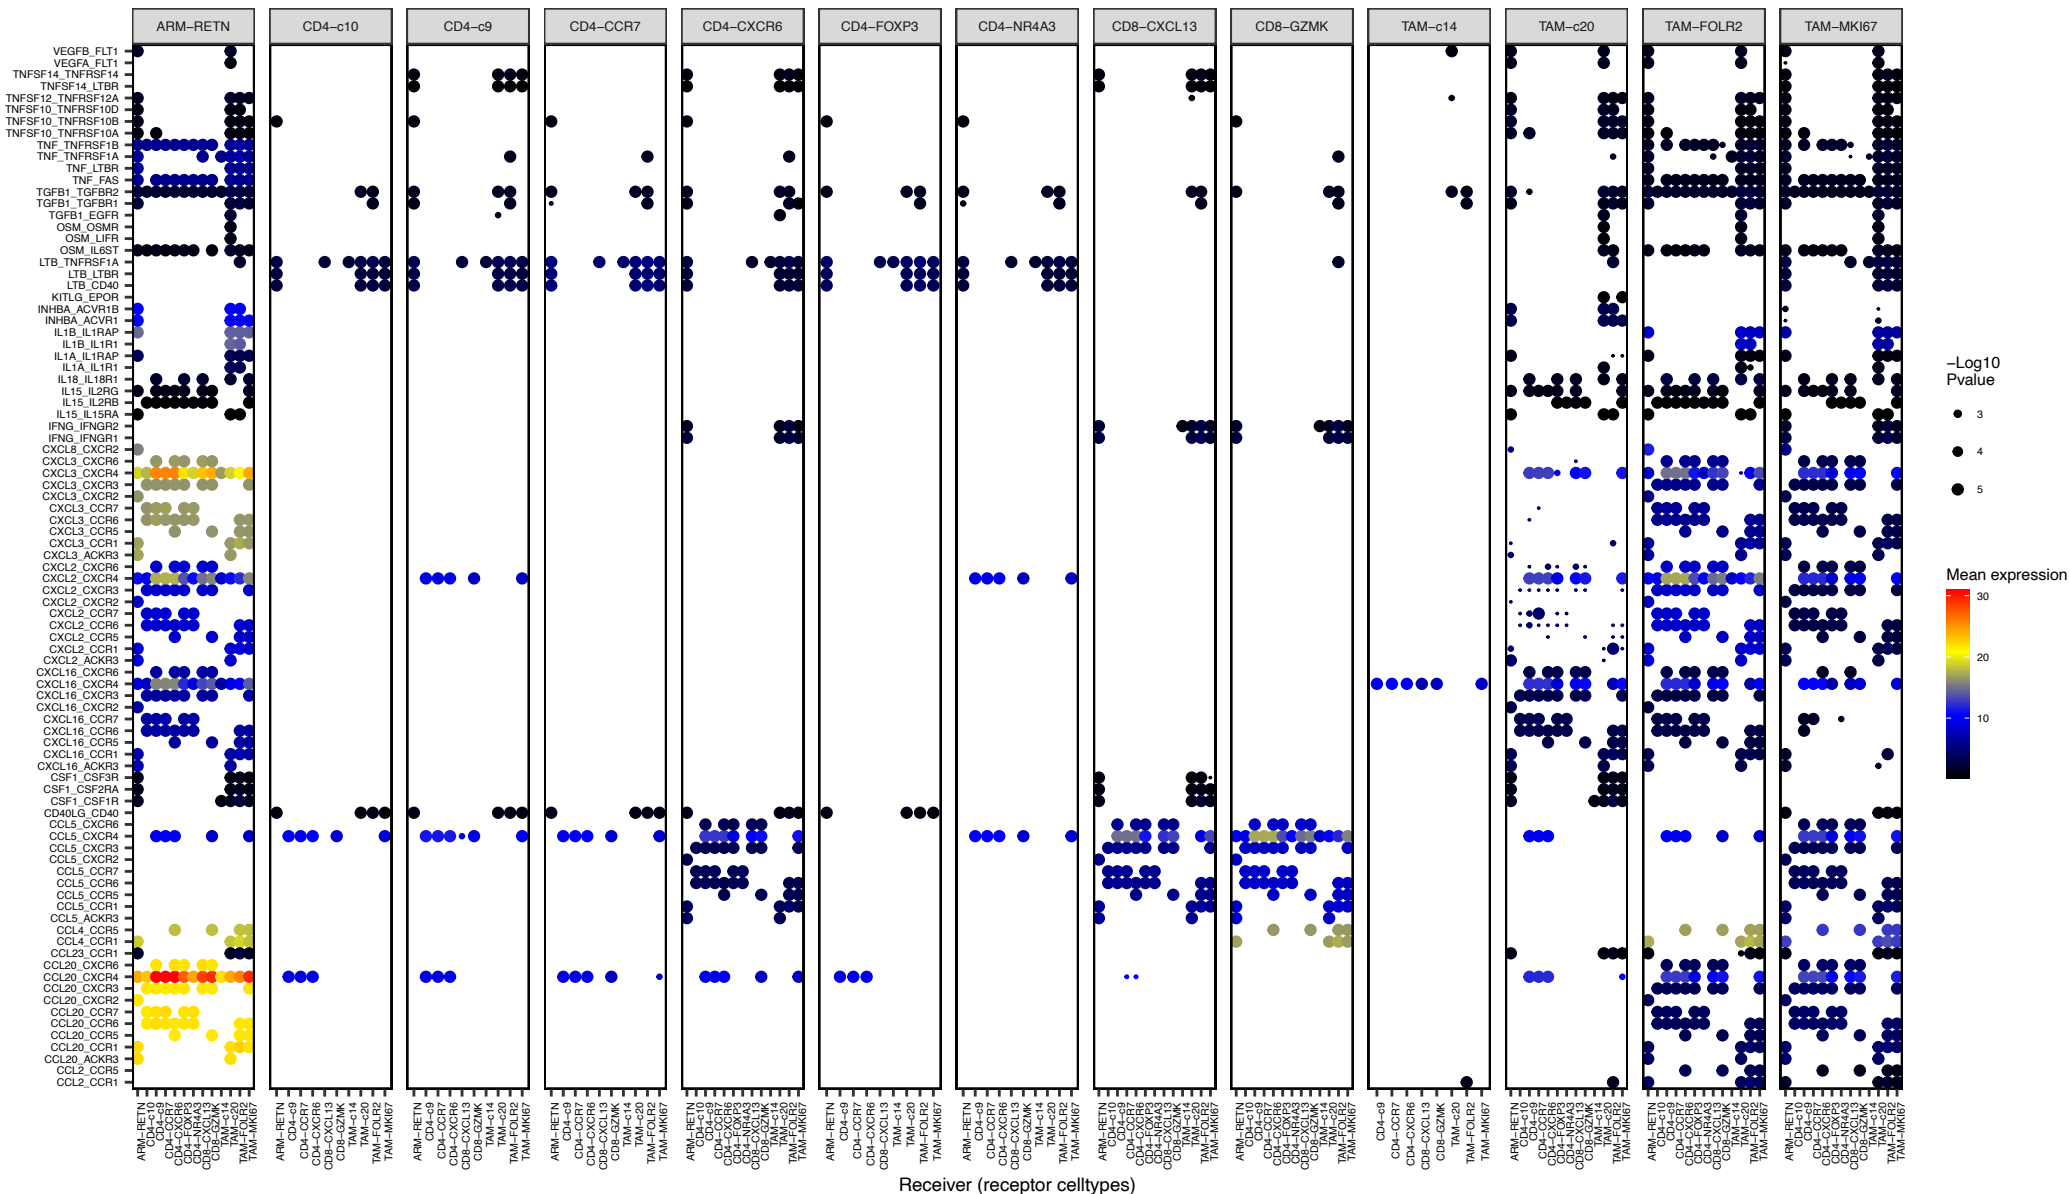

Figure S11 Overview of the chemokine ligand–receptor interactions. The  $p$  values (two–tailed permutation test) are indicated by circle size; the scale is on the right. The means of the average expression level of interacting molecule 1 in cluster 1 and interacting molecule 2 in cluster 2 are indicated by color.
