# Supplementary material for: Single-cell profiling reveals the trajectory of FOLR2-expressing tumor-associated macrophages to regulatory T cells in the progression of lung adenocarcinoma
Source: PubMed Central journal article supplement (PMC10397223; doi:10.1038/s41419-023-06021-6), 2023-08-02
Supplement: 41419_2023_6021_MOESM2_ESM.pdf [file 41419_2023_6021_MOESM2_ESM.pdf]

**Table S1. Clinical features of 12 LUAD patients involved in the scRNA-seq of this study.**

| Patient ID | Histological Type <sup>a</sup> | Morphologic pattern                      | Tumor location <sup>b</sup> | Tumor size (cm) | Gender | Age | Smoking | pTNM    | Stage | Driver mutation <sup>c</sup> | PD-L1 (TPS <sup>d</sup> ) | CD8 staining | TME classification <sup>e</sup> |
|------------|--------------------------------|------------------------------------------|-----------------------------|-----------------|--------|-----|---------|---------|-------|------------------------------|---------------------------|--------------|---------------------------------|
| P1         | MIA                            | lepidic                                  | LLL                         | 1.0             | Female | 62  | No      | T1aN0M0 | IA1   | <i>EGFR</i> L858R            | <1%                       | +            | III, tolerance                  |
| P2         | IA                             | acinar, papillary, micropapillary        | RML                         | 1.5             | Male   | 58  | Yes     | T1bN0M0 | IA2   | <i>BRAF</i> V600X            | <1%                       | +            | III, tolerance                  |
| P3         | IA                             | papillary, acinar, lepidic               | LUL                         | 3.8             | Female | 60  | No      | T2aN0M0 | IB    | <i>EGFR</i> G719A            | <1%                       | +            | III, tolerance                  |
| P4         | IA                             | solid, acinar, papillary, micropapillary | LUL                         | 1.1             | Male   | 63  | No      | T1bN2M0 | IIIA  | <i>CD74-ROSI</i> (C6:R34)    | <1%                       | +            | III, tolerance                  |
| P5         | AIS                            | lepidic                                  | LLL                         | 1.0             | Female | 66  | No      | TisN0M0 | 0     | <i>EGFR</i> L858R            | <1%                       | +            | III, tolerance                  |
| P6         | MIA                            | lepidic                                  | LUL                         | 1.1             | Male   | 59  | No      | T1aN0M0 | IA1   | NA                           | <1%                       | +            | III, tolerance                  |
| P7         | MIA                            | lepidic                                  | RUL                         | 1.3             | Female | 50  | No      | T1aN0M0 | IA1   | <i>EGFR</i> 19del            | <1%                       | +            | III, tolerance                  |
| P8         | IA                             | lepidic, papillary, acinar               | LUL                         | 3.1             | Female | 64  | No      | T2aN0M0 | IB    | <i>EGFR</i> 19del            | <1%                       | +            | III, tolerance                  |
| P9         | AIS                            | lepidic                                  | LUL                         | 1.0             | Female | 38  | No      | TisN0M0 | 0     | NA                           | <1%                       | +            | III, tolerance                  |
| P10        | MIA                            | lepidic                                  | RLL                         | 1.0             | Female | 63  | No      | T1aN0M0 | IA1   | <i>EGFR</i> 20ins            | <1%                       | +            | III, tolerance                  |
| P11        | MIA                            | lepidic                                  | LUL                         | 1.8             | Female | 75  | No      | T1aN0M0 | IA1   | <i>EGFR</i> L858R            | <1%                       | +            | III, tolerance                  |
| P12        | IA                             | acinar, lepidic                          | LUL                         | 2.5             | Female | 54  | No      | T1cN0M0 | IA3   | <i>EGFR</i> L858R            | <1%                       | +            | III, tolerance                  |

a: AIS, adenocarcinoma in situ; MIA, minimally invasive adenocarcinoma; IA, invasive adenocarcinoma;

b: LLL, left lower lobe; LUL, left upper lobe; RML, right middle lobe; RUL, right upper lobe; RLL, right lower lobe;

c: NA denotes detection for gene mutations not performed.

d: TPS, tumor proportion score.

e: Referring to Kim, T.K., et al., 2022. (PMID: 35701637)

**Table S2. Summary of 10x genomics scRNA-seq data.**

| <b>Sample ID</b> | <b>Patient ID</b> | <b>Estimated Number of Cells</b> | <b>Mean Reads per Cell</b> | <b>Median Genes per Cell</b> | <b>Number of Reads</b> | <b>Valid Barcodes</b> | <b>Sequencing Saturation</b> | <b>Q30 Bases in Barcode</b> | <b>Q30 Bases in RNA Read</b> | <b>Q30 Bases in UMI</b> | <b>Reads Mapped to Genome</b> |
|------------------|-------------------|----------------------------------|----------------------------|------------------------------|------------------------|-----------------------|------------------------------|-----------------------------|------------------------------|-------------------------|-------------------------------|
| NC_1             | P1                | 7,525                            | 74,243                     | 1,828                        | 558,682,362            | 96.90%                | 68.30%                       | 94.10%                      | 90.00%                       | 93.50%                  | 94.70%                        |
| MIA_1            | P1                | 7,846                            | 63,896                     | 1,695                        | 501,333,637            | 97.20%                | 66.10%                       | 94.30%                      | 90.20%                       | 93.70%                  | 94.50%                        |
| NC_2             | P2                | 14,206                           | 36,149                     | 1,707                        | 513,535,824            | 97.40%                | 45.50%                       | 94.30%                      | 90.50%                       | 93.70%                  | 94.40%                        |
| IA_2             | P2                | 7,567                            | 72,809                     | 1,653                        | 550,946,592            | 97.70%                | 63.70%                       | 94.30%                      | 90.10%                       | 93.70%                  | 94.70%                        |
| IA_3             | P3                | 9,623                            | 53,333                     | 1,448                        | 513,226,577            | 97.70%                | 43.70%                       | 96.20%                      | 92.00%                       | 95.40%                  | 94.60%                        |
| IA_4             | P4                | 7,378                            | 70,932                     | 1,483                        | 523,342,506            | 97.40%                | 47.00%                       | 96.20%                      | 92.00%                       | 95.50%                  | 95.60%                        |
| AIS_5            | P5                | 9,172                            | 55,451                     | 1,754                        | 508,603,001            | 98.40%                | 56.70%                       | 96.20%                      | 90.00%                       | 96.00%                  | 94.10%                        |
| NC_6             | P6                | 10,026                           | 54,559                     | 1,439                        | 547,017,116            | 98.40%                | 64.20%                       | 96.30%                      | 91.20%                       | 96.10%                  | 95.00%                        |
| MIA_6            | P6                | 12,792                           | 41,668                     | 1,943                        | 533,022,264            | 98.40%                | 52.50%                       | 96.30%                      | 91.00%                       | 96.10%                  | 95.40%                        |
| MIA_7            | P7                | 9,783                            | 54,519                     | 1,671                        | 533,367,842            | 98.20%                | 60.20%                       | 97.00%                      | 93.10%                       | 96.90%                  | 95.60%                        |
| IA_8             | P8                | 8,459                            | 66,558                     | 1,898                        | 563,017,785            | 98.20%                | 62.80%                       | 96.90%                      | 93.20%                       | 96.80%                  | 96.10%                        |
| AIS_9            | P9                | 14,470                           | 37,399                     | 1,321                        | 541,174,263            | 98.10%                | 65.00%                       | 95.40%                      | 91.30%                       | 94.20%                  | 96.10%                        |
| MIA_10           | P10               | 9,053                            | 56,940                     | 1,509                        | 515,484,301            | 98.10%                | 73.90%                       | 97.00%                      | 92.90%                       | 96.70%                  | 96.20%                        |
| MIA_11           | P11               | 7,070                            | 71,358                     | 2,466                        | 504,507,123            | 98.20%                | 62.10%                       | 97.00%                      | 93.20%                       | 96.80%                  | 96.20%                        |
| IA_12            | P12               | 9,806                            | 53,092                     | 1,323                        | 520,628,946            | 98.20%                | 66.70%                       | 97.00%                      | 93.10%                       | 96.80%                  | 96.30%                        |

Table S2 continued

| Sample ID | Patient ID | Reads Mapped Confidently to Genome | Reads Mapped Confidently to Intergenic Regions | Reads Mapped Confidently to Intronic Regions | Reads Mapped Confidently to Exonic Regions | Reads Mapped Confidently to Transcriptome | Reads Mapped Antisense to Gene | Fraction Reads in Cells | Total Genes Detected | Median UMI Counts per Cell |
|-----------|------------|------------------------------------|------------------------------------------------|----------------------------------------------|--------------------------------------------|-------------------------------------------|--------------------------------|-------------------------|----------------------|----------------------------|
| NC_1      | P1         | 91.20%                             | 6.80%                                          | 37.80%                                       | 46.60%                                     | 42.40%                                    | 1.90%                          | 84.80%                  | 24,354               | 4,691                      |
| MIA_1     | P1         | 92.20%                             | 7.30%                                          | 39.70%                                       | 45.20%                                     | 41.20%                                    | 1.70%                          | 83.70%                  | 24,644               | 4,458                      |
| NC_2      | P2         | 91.20%                             | 8.30%                                          | 30.70%                                       | 52.10%                                     | 47.80%                                    | 1.90%                          | 90.90%                  | 24,884               | 3,859                      |
| IA_2      | P2         | 92.30%                             | 7.70%                                          | 27.90%                                       | 56.70%                                     | 53.10%                                    | 1.30%                          | 94.00%                  | 24,688               | 5,089                      |
| IA_3      | P3         | 91.80%                             | 11.60%                                         | 25.90%                                       | 54.30%                                     | 50.80%                                    | 1.20%                          | 87.70%                  | 25,267               | 4,233                      |
| IA_4      | P4         | 93.10%                             | 9.90%                                          | 28.80%                                       | 54.30%                                     | 50.50%                                    | 1.50%                          | 92.70%                  | 25,410               | 4,346                      |
| AIS_5     | P5         | 91.30%                             | 8.70%                                          | 24.40%                                       | 58.20%                                     | 54.40%                                    | 1.20%                          | 83.10%                  | 24,787               | 5,593                      |
| NC_6      | P6         | 92.50%                             | 7.60%                                          | 21.10%                                       | 63.80%                                     | 59.90%                                    | 1.30%                          | 91.90%                  | 24,169               | 4,042                      |
| MIA_6     | P6         | 93.00%                             | 8.40%                                          | 25.30%                                       | 59.30%                                     | 55.60%                                    | 1.30%                          | 92.70%                  | 24,655               | 5,874                      |
| MIA_7     | P7         | 92.00%                             | 9.00%                                          | 24.60%                                       | 58.30%                                     | 55.00%                                    | 1.00%                          | 90.10%                  | 24,490               | 5,242                      |
| IA_8      | P8         | 92.60%                             | 6.20%                                          | 20.20%                                       | 66.30%                                     | 62.70%                                    | 1.00%                          | 94.70%                  | 24,036               | 6,543                      |
| AIS_9     | P9         | 92.40%                             | 9.10%                                          | 21.50%                                       | 61.90%                                     | 58.10%                                    | 1.30%                          | 90.70%                  | 24,371               | 3,679                      |
| MIA_10    | P10        | 93.10%                             | 6.00%                                          | 18.80%                                       | 68.30%                                     | 64.10%                                    | 1.40%                          | 81.60%                  | 24,177               | 4,365                      |
| MIA_11    | P11        | 93.40%                             | 8.70%                                          | 21.50%                                       | 63.20%                                     | 59.50%                                    | 1.30%                          | 92.40%                  | 24,250               | 7,781                      |
| IA_12     | P12        | 93.50%                             | 7.50%                                          | 17.50%                                       | 68.50%                                     | 64.50%                                    | 1.20%                          | 90.00%                  | 24,270               | 4,577                      |

**Table S3. Canonical markers used to annotate each cell type.**

| Celltype    | Sub celltype                  | Canonical markers |          |       |
|-------------|-------------------------------|-------------------|----------|-------|
|             |                               |                   |          |       |
| Epithelial  | -                             | EPCAM             | KRT8     |       |
| Epithelial  | AT1                           | AGER              | CLIC5    |       |
| Epithelial  | AT2                           | SFTPB             | MUC1     |       |
| Epithelial  | Ciliated                      | TPPP3             | C20orf85 |       |
| Epithelial  | Club                          | SCGB1A1           |          |       |
| T cells     | -                             | CD3D              | CD3E     |       |
| T cells     | CD4 <sup>+</sup> T cells      | CD4               |          |       |
| T cells     | CD4 <sup>+</sup> CCR7         | CCR7              |          |       |
| T cells     | CD4 <sup>+</sup> CXCR6        | CXCR6             |          |       |
| T cells     | CD4 <sup>+</sup> FOXP3 (Treg) | FOXP3             |          |       |
| T cells     | CD4 <sup>+</sup> NR4A3        | NR4A3             |          |       |
| T cells     | CD8 <sup>+</sup> T cells      | CD8A              | CD8B     |       |
| T cells     | CD8 <sup>+</sup> GZMK (Teff)  | GZMK              |          |       |
| T cells     | CD8 <sup>+</sup> CXCL13       | CXCL13            |          |       |
| T cells     | CD8 <sup>+</sup> ZNF683       | ZNF683            |          |       |
| T cells     | CD8 <sup>+</sup> KLRD1        | KLRD1             |          |       |
| T cells     | CD8 <sup>+</sup> KLRD1-CCL4L2 | KLRD1             | CCL4L2   |       |
| B cells     | -                             | MS4A1             |          |       |
| B cells     | Plasma                        | JCHAIN            |          |       |
| NK cells    | -                             | NKG7              | KLRF1    |       |
| Myeloids    | -                             | CD68              | MSR1     |       |
| Myeloids    | Macrophages                   | MRC1              | C1QA     | APOE  |
| Myeloids    | ARM                           | FABP4             | MCEMP1   | MARCO |
| Myeloids    | TAM-FOLR2                     | FOLR2             |          |       |
| Myeloids    | TAM-MIK67                     | MKI67             |          |       |
| Myeloids    | CD14 <sup>+</sup> monocytes   | CD14              | VCAN     |       |
| Myeloids    | CD16 <sup>+</sup> monocytes   | FCGR3A            |          |       |
| Myeloids    | Neutrophil                    | FCGR3B            |          |       |
| Myeloids    | Mast                          | TPSAB1            |          |       |
| Myeloids    | DC                            | CD1C              |          |       |
| Stromal     | -                             | COL1A1            | ACTA2    |       |
| Endothelial | -                             | CDH5              | VWF      |       |

**Table S4. Top 10 significantly differential expressed genes for epithelial cell clusters.**

| cluster  | gene            | avg_log2FC  | pct.1 | pct.2 | p_val     | p_val_adj   |
|----------|-----------------|-------------|-------|-------|-----------|-------------|
| AT2      | NAPSA           | 3.027576059 | 0.947 | 0.44  | 0         | 0           |
| AT2      | NPC2            | 3.027231195 | 0.938 | 0.337 | 0         | 0           |
| AT2      | SFTPA1          | 2.854441507 | 0.668 | 0.242 | 0         | 0           |
| AT2      | C4BPA           | 2.845622961 | 0.725 | 0.108 | 0         | 0           |
| AT2      | <b>SFTPB</b>    | 2.7250115   | 0.955 | 0.44  | 0         | 0           |
| AT2      | SERPINA1        | 2.45894219  | 0.688 | 0.182 | 0         | 0           |
| AT2      | SFTPA2          | 2.904788639 | 0.686 | 0.298 | 1.01E-296 | 2.56E-292   |
| AT2      | SPINK1          | 2.152811441 | 0.201 | 0.03  | 7.78E-108 | 1.97E-103   |
| AT2      | SFTPC           | 3.52408706  | 0.605 | 0.6   | 1.63E-09  | 4.13E-05    |
| AT2      | <b>MUC1</b>     | 1.801458833 | 0.887 | 0.416 | 0         | 0           |
| Ciliated | C9orf24         | 4.722751442 | 0.944 | 0.022 | 0         | 0           |
| Ciliated | <b>C20orf85</b> | 4.628528094 | 0.933 | 0.013 | 0         | 0           |
| Ciliated | C11orf88        | 4.031508792 | 0.908 | 0.006 | 0         | 0           |
| Ciliated | RSPH1           | 4.01873317  | 0.949 | 0.041 | 0         | 0           |
| Ciliated | C1orf194        | 4.015958232 | 0.928 | 0.01  | 0         | 0           |
| Ciliated | SNTN            | 3.730391019 | 0.877 | 0.011 | 0         | 0           |
| Ciliated | C5orf49         | 3.711643971 | 0.918 | 0.041 | 0         | 0           |
| Ciliated | CAPS            | 5.643283534 | 0.99  | 0.157 | 1.51E-274 | 3.83E-270   |
| Ciliated | GSTA1           | 3.691812941 | 0.795 | 0.115 | 1.93E-207 | 4.90E-203   |
| Ciliated | <b>TPPP3</b>    | 3.970365781 | 0.964 | 0.243 | 1.01E-187 | 2.55E-183   |
| AT1      | <b>AGER</b>     | 3.797691756 | 0.906 | 0.38  | 0         | 0           |
| AT1      | RTKN2           | 3.371489417 | 0.781 | 0.125 | 0         | 0           |
| AT1      | CAV1            | 3.222083855 | 0.92  | 0.56  | 0         | 0           |
| AT1      | EMP2            | 3.060426223 | 0.923 | 0.777 | 0         | 0           |
| AT1      | S100A4          | 2.802138312 | 0.807 | 0.581 | 0         | 0           |
| AT1      | MT1G            | 3.906373606 | 0.246 | 0.039 | 6.54E-184 | 1.66E-179   |
| AT1      | MT2A            | 3.400665946 | 0.567 | 0.61  | 1.31E-41  | 3.32E-37    |
| AT1      | MT1E            | 3.272162441 | 0.595 | 0.675 | 5.85E-34  | 1.48E-29    |
| AT1      | MT1X            | 3.696305468 | 0.377 | 0.419 | 5.34E-13  | 1.35E-08    |
| AT1      | <b>CLIC5</b>    | 2.124860594 | 0.759 | 0.353 | 0         | 0           |
| Club     | BPIFB1          | 5.916865654 | 0.637 | 0.022 | 0         | 0           |
| Club     | MSMB            | 4.607143101 | 0.399 | 0.006 | 0         | 0           |
| Club     | CXCL1           | 3.245080238 | 0.544 | 0.063 | 2.70E-206 | 6.83E-202   |
| Club     | <b>SCGB1A1</b>  | 8.346279916 | 0.954 | 0.338 | 1.16E-202 | 2.94E-198   |
| Club     | SLPI            | 3.536651811 | 0.979 | 0.637 | 6.50E-136 | 1.65E-131   |
| Club     | SCGB3A1         | 3.710658636 | 0.975 | 0.507 | 1.53E-135 | 3.87E-131   |
| Club     | LCN2            | 3.318209539 | 0.754 | 0.227 | 1.57E-135 | 3.96E-131   |
| Club     | TFF3            | 3.096110148 | 0.616 | 0.134 | 4.09E-121 | 1.04E-116   |
| Club     | MGP             | 3.069883528 | 0.68  | 0.236 | 7.14E-83  | 1.81E-78    |
| Club     | SCGB3A2         | 3.155398816 | 0.516 | 0.448 | 3.09E-08  | 0.000781934 |

**Table S5. Top 10 significantly differential expressed genes for myeloid clusters.**

| cluster   | gene     | avg_log2FC  | pct.1 | pct.2 | p_val | p_val_adj |
|-----------|----------|-------------|-------|-------|-------|-----------|
| ARM-RETN  | RETN     | 3.006328226 | 0.959 | 0.335 | 0     | 0         |
| ARM-RETN  | CCL20    | 2.193048328 | 0.648 | 0.213 | 0     | 0         |
| ARM-RETN  | IFI27    | 2.178853976 | 0.521 | 0.184 | 0     | 0         |
| ARM-RETN  | FABP4    | 2.171497789 | 0.788 | 0.241 | 0     | 0         |
| ARM-RETN  | LYZ      | 2.099935247 | 0.999 | 0.807 | 0     | 0         |
| ARM-RETN  | MARCO    | 2.093261741 | 0.978 | 0.332 | 0     | 0         |
| ARM-RETN  | INHBA    | 1.784264933 | 0.835 | 0.224 | 0     | 0         |
| ARM-RETN  | FBP1     | 1.68836059  | 0.993 | 0.527 | 0     | 0         |
| ARM-RETN  | LPL      | 1.654510572 | 0.909 | 0.27  | 0     | 0         |
| ARM-RETN  | MCEMP1   | 1.342202038 | 0.966 | 0.263 | 0     | 0         |
| DC        | CCL17    | 3.614418936 | 0.295 | 0.02  | 0     | 0         |
| DC        | S100B    | 2.75663214  | 0.46  | 0.064 | 0     | 0         |
| DC        | GPR183   | 2.288456636 | 0.919 | 0.294 | 0     | 0         |
| DC        | CD1C     | 2.114086958 | 0.597 | 0.036 | 0     | 0         |
| DC        | FCER1A   | 2.097069232 | 0.514 | 0.064 | 0     | 0         |
| DC        | LTB      | 1.914413462 | 0.62  | 0.253 | 0     | 0         |
| DC        | HLA-DQB2 | 1.902749759 | 0.347 | 0.094 | 0     | 0         |
| DC        | CLEC10A  | 1.856974602 | 0.645 | 0.121 | 0     | 0         |
| DC        | CD1E     | 1.828553224 | 0.533 | 0.023 | 0     | 0         |
| DC        | HLA-DPB1 | 1.76662412  | 0.998 | 0.813 | 0     | 0         |
| Mast      | TPSB2    | 7.117379717 | 0.981 | 0.033 | 0     | 0         |
| Mast      | TPSAB1   | 6.561950138 | 0.981 | 0.013 | 0     | 0         |
| Mast      | CPA3     | 5.434207547 | 0.988 | 0.011 | 0     | 0         |
| Mast      | MS4A2    | 4.403679726 | 0.976 | 0.007 | 0     | 0         |
| Mast      | CD69     | 4.276853431 | 0.963 | 0.402 | 0     | 0         |
| Mast      | HPGD     | 3.487610427 | 0.904 | 0.318 | 0     | 0         |
| Mast      | HPGDS    | 3.442615499 | 0.965 | 0.318 | 0     | 0         |
| Mast      | C1orf186 | 3.330334154 | 0.916 | 0.013 | 0     | 0         |
| Mast      | KIT      | 3.314534091 | 0.917 | 0.008 | 0     | 0         |
| Mast      | GATA2    | 3.087340741 | 0.841 | 0.007 | 0     | 0         |
| Mono-CD14 | EREG     | 3.611849312 | 0.817 | 0.205 | 0     | 0         |
| Mono-CD14 | VCAN     | 3.433317955 | 0.875 | 0.27  | 0     | 0         |
| Mono-CD14 | FCN1     | 2.76937259  | 0.986 | 0.195 | 0     | 0         |
| Mono-CD14 | THBS1    | 2.409535221 | 0.67  | 0.365 | 0     | 0         |
| Mono-CD14 | IL1B     | 2.361463035 | 0.856 | 0.585 | 0     | 0         |
| Mono-CD14 | TIMP1    | 2.055915423 | 0.933 | 0.678 | 0     | 0         |
| Mono-CD14 | S100A9   | 1.897816845 | 0.984 | 0.739 | 0     | 0         |
| Mono-CD14 | NLRP3    | 1.886006202 | 0.857 | 0.318 | 0     | 0         |
| Mono-CD14 | CD300E   | 1.77685775  | 0.743 | 0.097 | 0     | 0         |

|            |          |             |       |       |             |             |
|------------|----------|-------------|-------|-------|-------------|-------------|
| Mono-CD14  | CXCL2    | 1.762294672 | 0.712 | 0.431 | 2.43E-252   | 6.16E-248   |
| Mono-CD16  | CDKN1C   | 2.628527207 | 0.791 | 0.097 | 0           | 0           |
| Mono-CD16  | LYPD2    | 2.569816612 | 0.393 | 0.005 | 0           | 0           |
| Mono-CD16  | LILRB2   | 2.101027351 | 0.961 | 0.311 | 0           | 0           |
| Mono-CD16  | TIMP1    | 2.094071271 | 0.978 | 0.685 | 0           | 0           |
| Mono-CD16  | FCGR3A   | 2.085756881 | 0.973 | 0.64  | 0           | 0           |
| Mono-CD16  | MTSS1    | 1.955370981 | 0.916 | 0.147 | 0           | 0           |
| Mono-CD16  | CD48     | 1.93658843  | 0.986 | 0.452 | 0           | 0           |
| Mono-CD16  | HES4     | 1.923887654 | 0.821 | 0.129 | 0           | 0           |
| Mono-CD16  | LST1     | 1.897203492 | 1     | 0.856 | 0           | 0           |
| Mono-CD16  | POU2F2   | 1.874959504 | 0.898 | 0.22  | 0           | 0           |
| Neutrophil | FCGR3B   | 5.216160191 | 0.854 | 0.016 | 0           | 0           |
| Neutrophil | G0S2     | 4.648403089 | 0.916 | 0.289 | 0           | 0           |
| Neutrophil | IFITM2   | 4.460400317 | 0.959 | 0.613 | 0           | 0           |
| Neutrophil | S100A8   | 4.098121809 | 0.924 | 0.552 | 0           | 0           |
| Neutrophil | CMTM2    | 3.894735696 | 0.556 | 0.029 | 0           | 0           |
| Neutrophil | NAMPT    | 3.763289605 | 0.969 | 0.885 | 0           | 0           |
| Neutrophil | PTGS2    | 3.754686017 | 0.772 | 0.408 | 0           | 0           |
| Neutrophil | CXCR2    | 3.717177043 | 0.543 | 0.077 | 0           | 0           |
| Neutrophil | SLC25A37 | 3.618983517 | 0.647 | 0.351 | 0           | 0           |
| Neutrophil | SMCHD1   | 3.320401893 | 0.685 | 0.602 | 0           | 0           |
| TAM-c12    | AIF1     | 1.242434352 | 0.855 | 0.846 | 7.97E-75    | 2.02E-70    |
| TAM-c12    | TUBA1B   | 1.283237297 | 0.774 | 0.839 | 8.59E-50    | 2.18E-45    |
| TAM-c12    | LGALS1   | 1.17242625  | 0.811 | 0.856 | 1.15E-48    | 2.90E-44    |
| TAM-c12    | FTL      | 1.217937994 | 0.995 | 0.999 | 6.57E-36    | 1.66E-31    |
| TAM-c12    | SPP1     | 1.479182342 | 0.215 | 0.115 | 6.56E-16    | 1.66E-11    |
| TAM-c12    | S100B    | 2.217111069 | 0.187 | 0.114 | 3.09E-10    | 7.82E-06    |
| TAM-c12    | IGHA1    | 2.053395246 | 0.093 | 0.154 | 0.000605418 | 1           |
| TAM-c12    | IGKC     | 3.016172256 | 0.255 | 0.287 | 0.352866172 | 1           |
| TAM-c12    | IGLC2    | 3.54548639  | 0.124 | 0.142 | 0.659106186 | 1           |
| TAM-c12    | SCGB3A1  | 1.127496813 | 0.301 | 0.387 | 0.85072054  | 1           |
| TAM-c18    | CAV1     | 2.775892708 | 0.779 | 0.058 | 0           | 0           |
| TAM-c18    | EMP2     | 2.434911514 | 0.805 | 0.124 | 8.02E-162   | 2.03E-157   |
| TAM-c18    | NAPSA    | 2.736901588 | 0.55  | 0.186 | 2.06E-41    | 5.22E-37    |
| TAM-c18    | SLPI     | 2.702781077 | 0.45  | 0.121 | 5.93E-40    | 1.50E-35    |
| TAM-c18    | SFTPB    | 3.198054973 | 0.685 | 0.39  | 9.79E-27    | 2.48E-22    |
| TAM-c18    | SFTPA2   | 2.774559596 | 0.477 | 0.187 | 3.23E-23    | 8.18E-19    |
| TAM-c18    | SCGB3A1  | 4.258639762 | 0.537 | 0.384 | 8.48E-08    | 0.002147751 |
| TAM-c18    | SCGB3A2  | 3.265786611 | 0.295 | 0.162 | 1.50E-07    | 0.003809572 |
| TAM-c18    | SFTPC    | 4.131168285 | 0.644 | 0.512 | 0.00028427  | 1           |
| TAM-c18    | SCGB1A1  | 3.697705214 | 0.416 | 0.369 | 0.45664016  | 1           |
| TAM-FOLR2  | SEPP1    | 3.544691252 | 0.793 | 0.079 | 0           | 0           |
| TAM-FOLR2  | SPP1     | 3.152646559 | 0.415 | 0.073 | 0           | 0           |
| TAM-FOLR2  | LGMN     | 2.926280999 | 0.923 | 0.257 | 0           | 0           |
| TAM-FOLR2  | RNASE1   | 2.861752955 | 0.784 | 0.158 | 0           | 0           |

|           |          |             |       |       |           |           |
|-----------|----------|-------------|-------|-------|-----------|-----------|
| TAM-FOLR2 | APOE     | 2.554146003 | 0.921 | 0.574 | 0         | 0         |
| TAM-FOLR2 | FOLR2    | 2.518206142 | 0.876 | 0.165 | 0         | 0         |
| TAM-FOLR2 | A2M      | 2.469549338 | 0.966 | 0.212 | 0         | 0         |
| TAM-FOLR2 | SLC40A1  | 2.382171432 | 0.81  | 0.106 | 0         | 0         |
| TAM-FOLR2 | CCL13    | 2.255573099 | 0.442 | 0.03  | 0         | 0         |
| TAM-FOLR2 | CCL18    | 2.289413222 | 0.524 | 0.28  | 2.67E-217 | 6.75E-213 |
| TAM-MKI67 | STMN1    | 2.997634899 | 0.986 | 0.506 | 0         | 0         |
| TAM-MKI67 | HIST1H4C | 2.927138902 | 0.781 | 0.278 | 0         | 0         |
| TAM-MKI67 | HMGB2    | 2.734587559 | 0.97  | 0.612 | 0         | 0         |
| TAM-MKI67 | KIAA0101 | 2.400344279 | 0.865 | 0.021 | 0         | 0         |
| TAM-MKI67 | TYMS     | 2.287835888 | 0.79  | 0.018 | 0         | 0         |
| TAM-MKI67 | TUBB     | 2.233377409 | 0.949 | 0.694 | 0         | 0         |
| TAM-MKI67 | CCL5     | 2.331661343 | 0.455 | 0.17  | 1.82E-139 | 4.60E-135 |
| TAM-MKI67 | NKG7     | 2.509363316 | 0.37  | 0.127 | 4.39E-121 | 1.11E-116 |
| TAM-MKI67 | GPLY     | 2.434969564 | 0.188 | 0.077 | 5.21E-40  | 1.32E-35  |
| TAM-MKI67 | MKI67    | 2.087943551 | 0.704 | 0.008 | 0         | 0         |



**Table S6. Top 10 significantly differential expressed genes for T lymphocyte clusters.**

| cluster   | gene     | avg_log2FC  | pct.1 | pct.2 | p_val     | p_val_adj |
|-----------|----------|-------------|-------|-------|-----------|-----------|
| CD4-CCR7  | KLF2     | 1.318569604 | 0.805 | 0.507 | 0         | 0         |
| CD4-CCR7  | LTB      | 1.219432252 | 0.922 | 0.532 | 0         | 0         |
| CD4-CCR7  | CCR7     | 1.098495163 | 0.449 | 0.122 | 0         | 0         |
| CD4-CCR7  | GPR183   | 0.901727024 | 0.783 | 0.448 | 0         | 0         |
| CD4-CCR7  | JUNB     | 0.812783967 | 0.967 | 0.85  | 0         | 0         |
| CD4-CCR7  | LDHB     | 0.778527789 | 0.873 | 0.598 | 0         | 0         |
| CD4-CCR7  | RPS6     | 0.743755168 | 1     | 0.991 | 0         | 0         |
| CD4-CCR7  | RPL32    | 0.731657182 | 1     | 0.996 | 0         | 0         |
| CD4-CCR7  | EEF1B2   | 0.712710083 | 0.995 | 0.927 | 0         | 0         |
| CD4-CCR7  | NFKBIA   | 0.72402555  | 0.878 | 0.718 | 3.22E-213 | 8.15E-209 |
| CD4-CXCR6 | CD40LG   | 1.102078035 | 0.564 | 0.205 | 0         | 0         |
| CD4-CXCR6 | ALOX5AP  | 1.084450058 | 0.839 | 0.521 | 0         | 0         |
| CD4-CXCR6 | RBPJ     | 1.074518242 | 0.634 | 0.282 | 0         | 0         |
| CD4-CXCR6 | BATF     | 1.019363661 | 0.536 | 0.276 | 0         | 0         |
| CD4-CXCR6 | CXCR6    | 0.935340591 | 0.415 | 0.145 | 0         | 0         |
| CD4-CXCR6 | CD52     | 0.900850697 | 0.984 | 0.906 | 0         | 0         |
| CD4-CXCR6 | S100A4   | 0.869610741 | 0.991 | 0.914 | 0         | 0         |
| CD4-CXCR6 | SH3BGRL3 | 0.809776939 | 0.989 | 0.942 | 0         | 0         |
| CD4-CXCR6 | CAPG     | 0.795597101 | 0.486 | 0.218 | 0         | 0         |
| CD4-CXCR6 | PLIN2    | 1.020182879 | 0.53  | 0.299 | 6.65E-262 | 1.68E-257 |
| CD4-FOXP3 | TNFRSF4  | 2.77156298  | 0.651 | 0.118 | 0         | 0         |
| CD4-FOXP3 | TNFRSF18 | 2.236753097 | 0.611 | 0.104 | 0         | 0         |
| CD4-FOXP3 | PMAIP1   | 1.918484491 | 0.65  | 0.2   | 0         | 0         |
| CD4-FOXP3 | TIGIT    | 1.909787644 | 0.731 | 0.173 | 0         | 0         |
| CD4-FOXP3 | LAIR2    | 1.833105652 | 0.511 | 0.06  | 0         | 0         |
| CD4-FOXP3 | CTLA4    | 1.761446025 | 0.685 | 0.158 | 0         | 0         |
| CD4-FOXP3 | PMCH     | 1.565253623 | 0.108 | 0.001 | 0         | 0         |
| CD4-FOXP3 | ICA1     | 1.533563162 | 0.412 | 0.024 | 0         | 0         |
| CD4-FOXP3 | CARD16   | 1.451557765 | 0.664 | 0.288 | 0         | 0         |
| CD4-FOXP3 | FOXP3    | 1.286707722 | 0.345 | 0.012 | 0         | 0         |
| CD4-NR4A3 | PABPC1   | 1.487155355 | 0.95  | 0.747 | 0         | 0         |
| CD4-NR4A3 | YPEL5    | 1.445988882 | 0.872 | 0.55  | 0         | 0         |
| CD4-NR4A3 | ATP1B3   | 1.405269257 | 0.683 | 0.399 | 0         | 0         |
| CD4-NR4A3 | CREM     | 1.369125716 | 0.893 | 0.577 | 0         | 0         |
| CD4-NR4A3 | REL      | 1.367751457 | 0.742 | 0.435 | 0         | 0         |
| CD4-NR4A3 | KDM6B    | 1.348970729 | 0.576 | 0.222 | 0         | 0         |
| CD4-NR4A3 | LMNA     | 1.342897089 | 0.734 | 0.387 | 0         | 0         |
| CD4-NR4A3 | HP       | 1.32372204  | 0.349 | 0.017 | 0         | 0         |
| CD4-NR4A3 | IRS2     | 1.293879553 | 0.44  | 0.112 | 0         | 0         |
| CD4-NR4A3 | NR4A3    | 1.236197009 | 0.443 | 0.129 | 0         | 0         |
| CD4-c9    | FKBP5    | 1.073768729 | 0.876 | 0.457 | 0         | 0         |
| CD4-c9    | XIST     | 1.15235493  | 0.757 | 0.351 | 1.66E-302 | 4.21E-298 |

|            |               |             |       |       |             |             |
|------------|---------------|-------------|-------|-------|-------------|-------------|
| CD4-c9     | AIM1          | 1.054457161 | 0.821 | 0.42  | 6.47E-269   | 1.64E-264   |
| CD4-c9     | IL7R          | 1.013126686 | 0.95  | 0.729 | 1.28E-260   | 3.25E-256   |
| CD4-c9     | SC5D          | 0.93719792  | 0.559 | 0.215 | 7.85E-232   | 1.99E-227   |
| CD4-c9     | CELF2         | 0.849786084 | 0.871 | 0.514 | 2.57E-226   | 6.51E-222   |
| CD4-c9     | RP11-138A9.1  | 0.861611009 | 0.64  | 0.272 | 7.95E-222   | 2.01E-217   |
| CD4-c9     | AHNAK         | 1.031549725 | 0.911 | 0.67  | 3.42E-197   | 8.65E-193   |
| CD4-c9     | ANKRD28       | 0.85602349  | 0.643 | 0.328 | 3.90E-149   | 9.87E-145   |
| CD4-c9     | KLRB1         | 0.918293849 | 0.666 | 0.376 | 1.50E-136   | 3.80E-132   |
| CD4-c10    | GIMAP7        | 0.754990702 | 0.533 | 0.435 | 1.29E-42    | 3.27E-38    |
| CD4-c10    | LTB           | 0.646361203 | 0.663 | 0.597 | 2.12E-36    | 5.37E-32    |
| CD4-c10    | GIMAP4        | 0.693093746 | 0.457 | 0.356 | 6.30E-35    | 1.59E-30    |
| CD4-c10    | N4BP2L2       | 0.636737408 | 0.678 | 0.678 | 1.39E-31    | 3.52E-27    |
| CD4-c10    | NKTR          | 0.779349543 | 0.437 | 0.4   | 3.90E-18    | 9.86E-14    |
| CD4-c10    | SFTPC         | 1.353558669 | 0.272 | 0.41  | 2.05E-13    | 5.20E-09    |
| CD4-c10    | DDX17         | 0.645032798 | 0.525 | 0.55  | 2.20E-11    | 5.56E-07    |
| CD4-c10    | ANKRD36C      | 0.668849225 | 0.167 | 0.129 | 3.51E-08    | 0.000888087 |
| CD4-c10    | IGKC          | 2.173717453 | 0.209 | 0.29  | 3.66E-06    | 0.092655164 |
| CD4-c10    | IGHA1         | 2.221410193 | 0.084 | 0.124 | 0.000113648 | 1           |
| CD8-CXCL13 | <b>CXCL13</b> | 3.285524942 | 0.436 | 0.012 | 0           | 0           |
| CD8-CXCL13 | KRT86         | 2.593839354 | 0.685 | 0.008 | 0           | 0           |
| CD8-CXCL13 | KRT81         | 1.935788281 | 0.473 | 0.003 | 0           | 0           |
| CD8-CXCL13 | FAM3C         | 2.073549684 | 0.679 | 0.092 | 5.17E-160   | 1.31E-155   |
| CD8-CXCL13 | CTLA4         | 2.079241011 | 0.83  | 0.194 | 2.63E-112   | 6.66E-108   |
| CD8-CXCL13 | CTSW          | 2.04162721  | 0.879 | 0.253 | 1.05E-100   | 2.65E-96    |
| CD8-CXCL13 | AC092580.4    | 1.908459657 | 0.788 | 0.207 | 7.07E-94    | 1.79E-89    |
| CD8-CXCL13 | CD7           | 2.249250367 | 0.939 | 0.443 | 1.52E-84    | 3.85E-80    |
| CD8-CXCL13 | RGS1          | 1.910314125 | 0.976 | 0.667 | 1.86E-70    | 4.70E-66    |
| CD8-CXCL13 | GZMB          | 1.870274525 | 0.77  | 0.247 | 1.05E-56    | 2.65E-52    |
| CD8-GZMK   | <b>GZMK</b>   | 3.42387827  | 0.954 | 0.161 | 0           | 0           |
| CD8-GZMK   | CCL4L2        | 3.032351851 | 0.612 | 0.147 | 0           | 0           |
| CD8-GZMK   | CCL3          | 2.292251407 | 0.327 | 0.089 | 0           | 0           |
| CD8-GZMK   | CCL4          | 2.069719195 | 0.943 | 0.453 | 0           | 0           |
| CD8-GZMK   | CCL3L3        | 1.971815865 | 0.406 | 0.057 | 0           | 0           |
| CD8-GZMK   | GZMA          | 1.667125534 | 0.946 | 0.479 | 0           | 0           |
| CD8-GZMK   | CST7          | 1.592735482 | 0.941 | 0.469 | 0           | 0           |
| CD8-GZMK   | DUSP2         | 1.57388347  | 0.923 | 0.682 | 0           | 0           |
| CD8-GZMK   | CMC1          | 1.566853821 | 0.608 | 0.244 | 0           | 0           |
| CD8-GZMK   | CRTAM         | 1.558377987 | 0.439 | 0.082 | 0           | 0           |
| CD8-KLRD1  | GNLY          | 3.055892031 | 0.838 | 0.107 | 0           | 0           |
| CD8-KLRD1  | <b>KLRD1</b>  | 2.249034268 | 0.875 | 0.187 | 0           | 0           |
| CD8-KLRD1  | FGFBP2        | 2.123363443 | 0.761 | 0.084 | 0           | 0           |
| CD8-KLRD1  | ZEB2          | 1.739782969 | 0.851 | 0.239 | 0           | 0           |
| CD8-KLRD1  | GZMB          | 1.658839314 | 0.866 | 0.213 | 0           | 0           |
| CD8-KLRD1  | TRGC2         | 1.655383879 | 0.689 | 0.215 | 0           | 0           |
| CD8-KLRD1  | NKG7          | 1.632873494 | 0.996 | 0.396 | 0           | 0           |

|                  |               |             |       |       |           |           |
|------------------|---------------|-------------|-------|-------|-----------|-----------|
| CD8-KLRD1        | PRF1          | 1.599722794 | 0.836 | 0.251 | 0         | 0         |
| CD8-KLRD1        | GZMH          | 1.528296372 | 0.914 | 0.272 | 0         | 0         |
| CD8-KLRD1        | FCGR3A        | 1.426458294 | 0.487 | 0.074 | 0         | 0         |
| CD8-KLRD1-CCL4L2 | FGFBP2        | 2.93486646  | 0.804 | 0.058 | 0         | 0         |
| CD8-KLRD1-CCL4L2 | NKG7          | 2.778023667 | 0.998 | 0.376 | 0         | 0         |
| CD8-KLRD1-CCL4L2 | GNLY          | 2.737641966 | 0.6   | 0.106 | 0         | 0         |
| CD8-KLRD1-CCL4L2 | GZMH          | 2.436962983 | 0.932 | 0.249 | 0         | 0         |
| CD8-KLRD1-CCL4L2 | GZMB          | 2.01032333  | 0.791 | 0.198 | 0         | 0         |
| CD8-KLRD1-CCL4L2 | <b>KLRD1</b>  | 1.800063181 | 0.741 | 0.178 | 0         | 0         |
| CD8-KLRD1-CCL4L2 | PRF1          | 1.735444758 | 0.821 | 0.233 | 0         | 0         |
| CD8-KLRD1-CCL4L2 | FCGR3A        | 1.618248243 | 0.486 | 0.06  | 0         | 0         |
| CD8-KLRD1-CCL4L2 | CST7          | 1.534361936 | 0.969 | 0.485 | 0         | 0         |
| CD8-KLRD1-CCL4L2 | <b>CCL4L2</b> | 1.103032243 | 0.481 | 0.178 | 2.20E-284 | 5.56E-280 |
| CD8-ZNF683       | KLRC1         | 1.952568408 | 0.334 | 0.025 | 0         | 0         |
| CD8-ZNF683       | TOB1          | 1.351531081 | 0.673 | 0.397 | 0         | 0         |
| CD8-ZNF683       | ITGA1         | 1.34828884  | 0.413 | 0.07  | 0         | 0         |
| CD8-ZNF683       | XCL1          | 1.340269272 | 0.377 | 0.089 | 0         | 0         |
| CD8-ZNF683       | CD8A          | 1.182580432 | 0.634 | 0.232 | 0         | 0         |
| CD8-ZNF683       | YBX3          | 1.024693013 | 0.361 | 0.119 | 0         | 0         |
| CD8-ZNF683       | HSP90AA1      | 1.022213599 | 0.961 | 0.941 | 0         | 0         |
| CD8-ZNF683       | HSPA1A        | 1.214270443 | 0.646 | 0.426 | 1.22E-269 | 3.08E-265 |
| CD8-ZNF683       | HSPH1         | 1.038286568 | 0.531 | 0.345 | 3.55E-210 | 9.00E-206 |
| CD8-ZNF683       | <b>ZNF683</b> | 0.905504074 | 0.271 | 0.05  | 0         | 0         |

**Table S7. IHC validation in an independent cohort (n=15).**

| IHC validation sample ID | Clinical features of IHC validation samples |                                                       |                 |        |     | IHC evaluation for NR4A3    |                             |                             |                             |                             |                                |
|--------------------------|---------------------------------------------|-------------------------------------------------------|-----------------|--------|-----|-----------------------------|-----------------------------|-----------------------------|-----------------------------|-----------------------------|--------------------------------|
|                          | Histological Type <sup>a</sup>              | Morphologic pattern                                   | Tumor size (cm) | Gender | Age | NR4A3-area1/mm <sup>2</sup> | NR4A3-area2/mm <sup>2</sup> | NR4A3-area3/mm <sup>2</sup> | NR4A3-area4/mm <sup>2</sup> | NR4A3-area5/mm <sup>2</sup> | NR4A3-mean No./mm <sup>2</sup> |
| V1                       | AIS                                         | lepidic                                               | 1.2             | Female | 36  | 8                           | 9                           | 1                           | 3                           | 8                           | 5.8                            |
| V2                       | AIS                                         | lepidic                                               | 1.5             | Female | 75  | 7                           | 2                           | 3                           | 2                           | 3                           | 3.4                            |
| V3                       | AIS                                         | lepidic                                               | 1.3             | Female | 71  | 2                           | 0                           | 4                           | 1                           | 3                           | 2                              |
| V4                       | AIS                                         | lepidic                                               | 1.3             | Female | 45  | 11                          | 4                           | 12                          | 3                           | 0                           | 6                              |
| V5                       | AIS                                         | lepidic                                               | 1.1             | Female | 68  | 8                           | 2                           | 3                           | 4                           | 7                           | 4.8                            |
| V6                       | MIA                                         | lepidic                                               | 0.7             | Female | 49  | 9                           | 21                          | 4                           | 10                          | 6                           | 10                             |
| V7                       | MIA                                         | lepidic                                               | 1.1             | Female | 51  | 22                          | 20                          | 29                          | 10                          | 8                           | 17.8                           |
| V8                       | MIA                                         | lepidic                                               | 1.3             | Female | 48  | 8                           | 13                          | 16                          | 70                          | 10                          | 23.4                           |
| V9                       | MIA                                         | lepidic                                               | 1.4             | Female | 54  | 5                           | 14                          | 5                           | 2                           | 7                           | 6.6                            |
| V10                      | MIA                                         | lepidic                                               | 1.2             | Female | 60  | 2                           | 31                          | 4                           | 22                          | 13                          | 14.4                           |
| V11                      | IA                                          | acinar, complex glandular, micropapillary             | 2.3             | Female | 59  | 201                         | 13                          | 44                          | 69                          | 39                          | 73.2                           |
| V12                      | IA                                          | acinar, lepidic, complex glandular                    | 1.8             | Female | 62  | 75                          | 62                          | 43                          | 70                          | 61                          | 62.2                           |
| V13                      | IA                                          | cribriform, acinar, micropapillary, complex glandular | 1.5             | Male   | 62  | 34                          | 39                          | 26                          | 30                          | 35                          | 32.8                           |
| V14                      | IA                                          | complex glandular, acinar, solid                      | 2.2             | Female | 74  | 9                           | 15                          | 16                          | 5                           | 29                          | 14.8                           |
| V15                      | IA                                          | acinar,papillary, lepidic                             | 2.4             | Male   | 66  | 38                          | 34                          | 19                          | 45                          | 34                          | 34                             |

**Table S7 continued**

| IHC validation sample ID | IHC evaluation for FOXP3    |                             |                             |                             |                             |                                | IHC evaluation for FOLR2    |                             |                             |                             |                             |                                |
|--------------------------|-----------------------------|-----------------------------|-----------------------------|-----------------------------|-----------------------------|--------------------------------|-----------------------------|-----------------------------|-----------------------------|-----------------------------|-----------------------------|--------------------------------|
|                          | FOXP3-area1/mm <sup>2</sup> | FOXP3-area2/mm <sup>2</sup> | FOXP3-area3/mm <sup>2</sup> | FOXP3-area4/mm <sup>2</sup> | FOXP3-area5/mm <sup>2</sup> | FOXP3-mean No./mm <sup>2</sup> | FOLR2-area1/mm <sup>2</sup> | FOLR2-area2/mm <sup>2</sup> | FOLR2-area3/mm <sup>2</sup> | FOLR2-area4/mm <sup>2</sup> | FOLR2-area5/mm <sup>2</sup> | FOLR2-mean No./mm <sup>2</sup> |
| V1                       | 31                          | 62                          | 73                          | 33                          | 44                          | 48.6                           | 743                         | 514                         | 587                         | 477                         | 587                         | 581.6                          |
| V2                       | 130                         | 59                          | 101                         | 65                          | 63                          | 83.6                           | 514                         | 624                         | 1101                        | 917                         | 404                         | 712                            |
| V3                       | 18                          | 46                          | 11                          | 28                          | 45                          | 29.6                           | 514                         | 881                         | 587                         | 551                         | 734                         | 653.4                          |
| V4                       | 38                          | 29                          | 41                          | 41                          | 30                          | 35.8                           | 110                         | 294                         | 917                         | 550                         | 440                         | 462.2                          |
| V5                       | 46                          | 47                          | 20                          | 27                          | 29                          | 33.8                           | 771                         | 330                         | 697                         | 1431                        | 734                         | 792.6                          |
| V6                       | 64                          | 91                          | 67                          | 113                         | 52                          | 77.4                           | 1468                        | 1064                        | 1027                        | 917                         | 1027                        | 1100.6                         |
| V7                       | 45                          | 22                          | 31                          | 85                          | 67                          | 50                             | 844                         | 587                         | 807                         | 587                         | 954                         | 755.8                          |
| V8                       | 209                         | 162                         | 118                         | 82                          | 80                          | 130.2                          | 991                         | 1248                        | 440                         | 477                         | 1349                        | 901                            |
| V9                       | 73                          | 81                          | 82                          | 136                         | 64                          | 87.2                           | 734                         | 1101                        | 917                         | 514                         | 514                         | 756                            |
| V10                      | 81                          | 103                         | 108                         | 123                         | 120                         | 107                            | 954                         | 330                         | 634                         | 1615                        | 1248                        | 956.2                          |
| V11                      | 68                          | 162                         | 421                         | 137                         | 309                         | 219.4                          | 2202                        | 2092                        | 1908                        | 1394                        | 1615                        | 1842.2                         |
| V12                      | 235                         | 348                         | 346                         | 241                         | 346                         | 303.2                          | 2055                        | 1909                        | 1615                        | 1431                        | 2312                        | 1864.4                         |
| V13                      | 201                         | 157                         | 227                         | 237                         | 215                         | 207.4                          | 1505                        | 1358                        | 2129                        | 2276                        | 1468                        | 1747.2                         |
| V14                      | 207                         | 238                         | 122                         | 217                         | 183                         | 193.4                          | 1175                        | 1725                        | 2092                        | 1909                        | 2533                        | 1886.8                         |
| V15                      | 176                         | 141                         | 132                         | 256                         | 282                         | 197.4                          | 1358                        | 1394                        | 991                         | 1872                        | 1578                        | 1438.6                         |

a: AIS, adenocarcinoma in situ; MIA, minimally invasive adenocarcinoma; IA, invasive adenocarcinoma.
